# Supplementary material for: One-pot synthesis of tetrahydropyrimidinecarboxamides enabling in vitro anticancer activity: a combinative study with clinically relevant brain-penetrant drugs
Source: PubMed Central journal article supplement (PMC11348845; doi:10.1039/d4ra04171b), 2024-08-27
Supplement: RA-014-D4RA04171B-s001.pdf [file RA-014-D4RA04171B-s001.pdf]

# One-pot synthesis of tetrahydropyrimidinecarboxamides enabling In Vitro anticancer activities: A combinative study with clinically relevant brain-penetrant drugs

Dipti B. Upadhyay<sup>a,#</sup>, Joaquina Nogales<sup>b,#</sup>, Jaydeep A. Mokariya<sup>a</sup>, Raturajsinh M. Vala<sup>a</sup>, Vasudha Tandon<sup>b</sup>, Sourav Banerjee<sup>b,\*</sup>, Hitendra M. Patel<sup>a,\*</sup>

<sup>a</sup> Department of Chemistry, Sardar Patel University, Vallabh Vidyanagar, Gujarat, India

<sup>b</sup> Department of Cellular & Systems Medicine, School of Medicine, University of Dundee, Dundee DD1 9SY, United Kingdom

# contributed equally

\* Corresponding authors: Hitendra M. Patel, Email: [hm\\_patel@spuvvn.edu](mailto:hm_patel@spuvvn.edu)

Sourav Banerjee, Email: [s.y.banerjee@dundee.ac.uk](mailto:s.y.banerjee@dundee.ac.uk)

## Table of Contents

| Sr. No. | Content                                                                                      | Page No. |
|---------|----------------------------------------------------------------------------------------------|----------|
| 1       | <b>4f</b> does not induce apoptosis in cancer cells                                          | 2        |
| 2       | kinase inhibitory activity Figure                                                            | 2        |
| 3       | <sup>1</sup> H-NMR and <sup>13</sup> C{ <sup>1</sup> H}-NMR spectra of compound <b>4a-4t</b> | 3-23     |
| 4       | LCMS of compound <b>4a-4t</b>                                                                | 23-28    |

## GBM6: AnnexinV-FITC + bright field

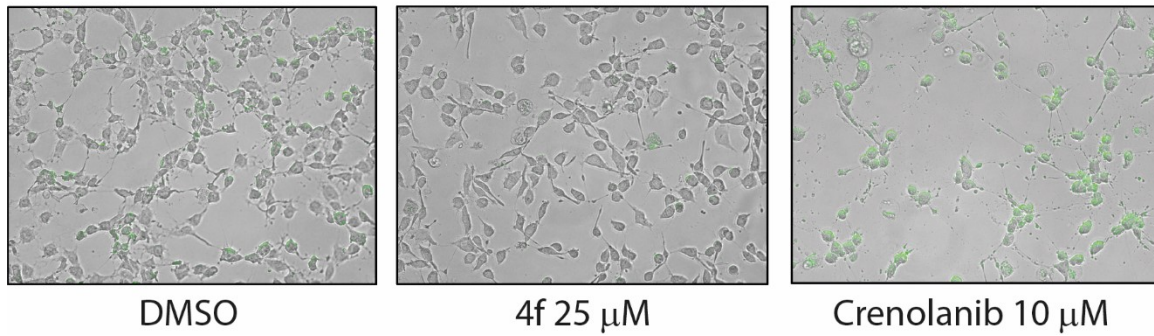

**Figure S1:** 4f at 25  $\mu\text{M}$  does not induce apoptosis in GBM6 after 16 hr treatment. Images are superimposed bright field with FITC fluorescent channels. Crenolanib treatment is used as control for apoptosis induction.

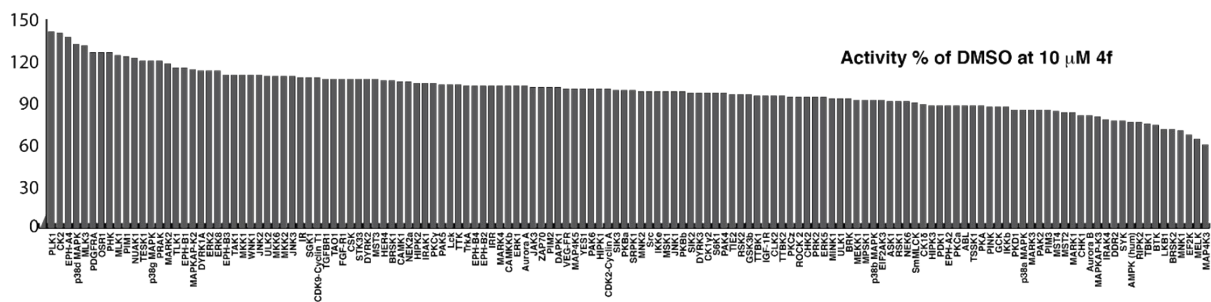

# Copies of $^1\text{H}$ NMR and $^{13}\text{C}\{^1\text{H}\}$ - NMR spectra for compound 4a-4ab

DU/DC-101  
single\_pulse

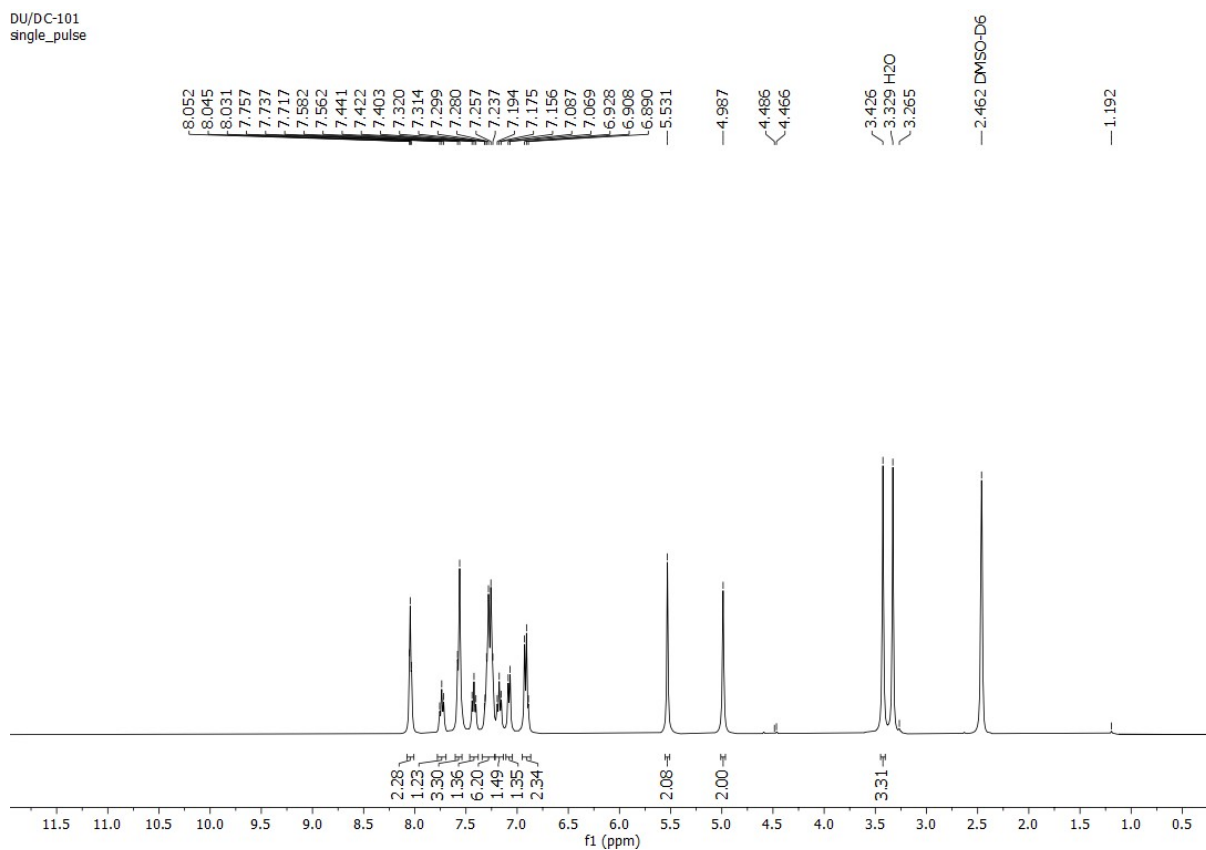

**Figure S3.**  $^1\text{H}$  NMR spectrum of compound 4a at 400 MHz in DMSO-d<sub>6</sub>

DU/DC-101  
single\_pulse decoupled gated NOE

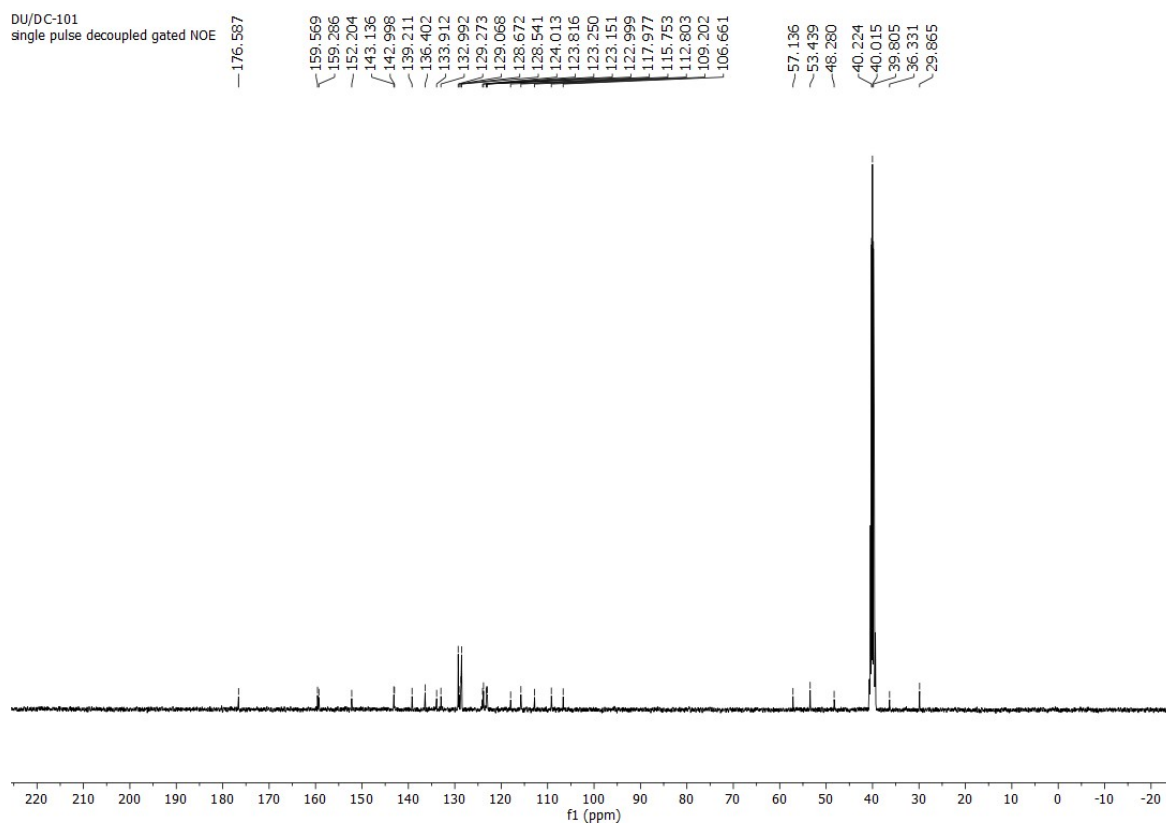

**Figure S4.**  $^{13}\text{C}$  NMR spectrum of compound **4a** at 150 MHz in DMSO- $d_6$

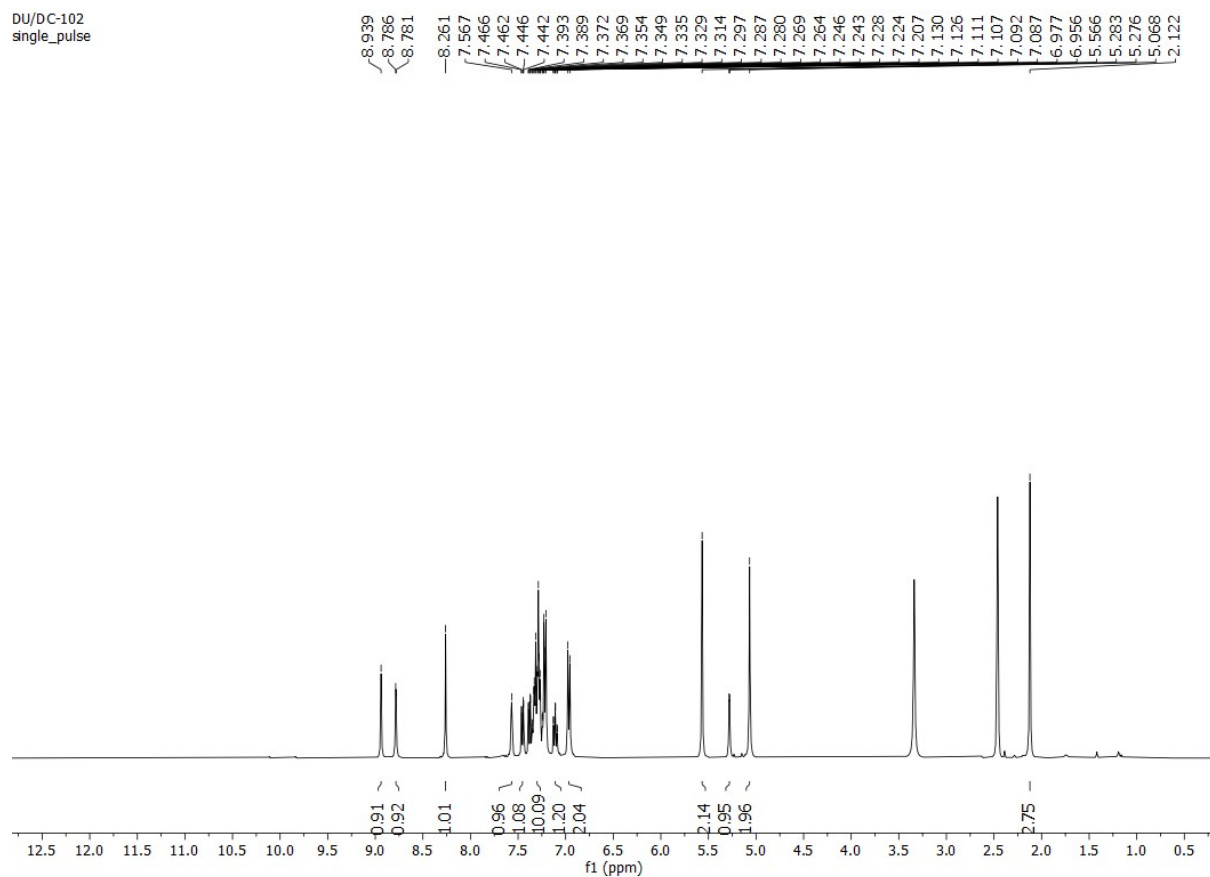

**Figure S5.**  $^1\text{H}$  NMR spectrum of compound **4b** at 400 MHz in DMSO- $d_6$

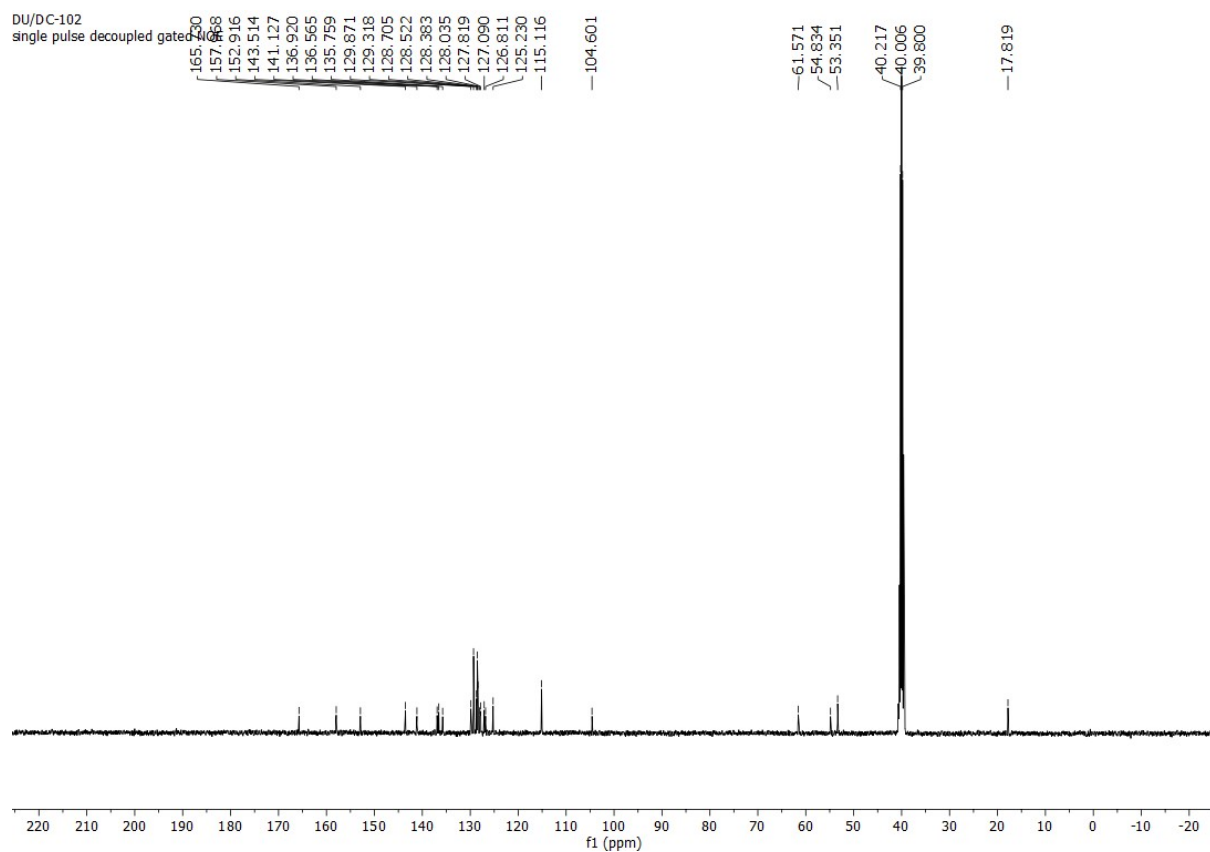

**Figure S6.**  $^{13}\text{C}$  NMR spectrum of compound **4b** at 150 MHz in DMSO- $d_6$

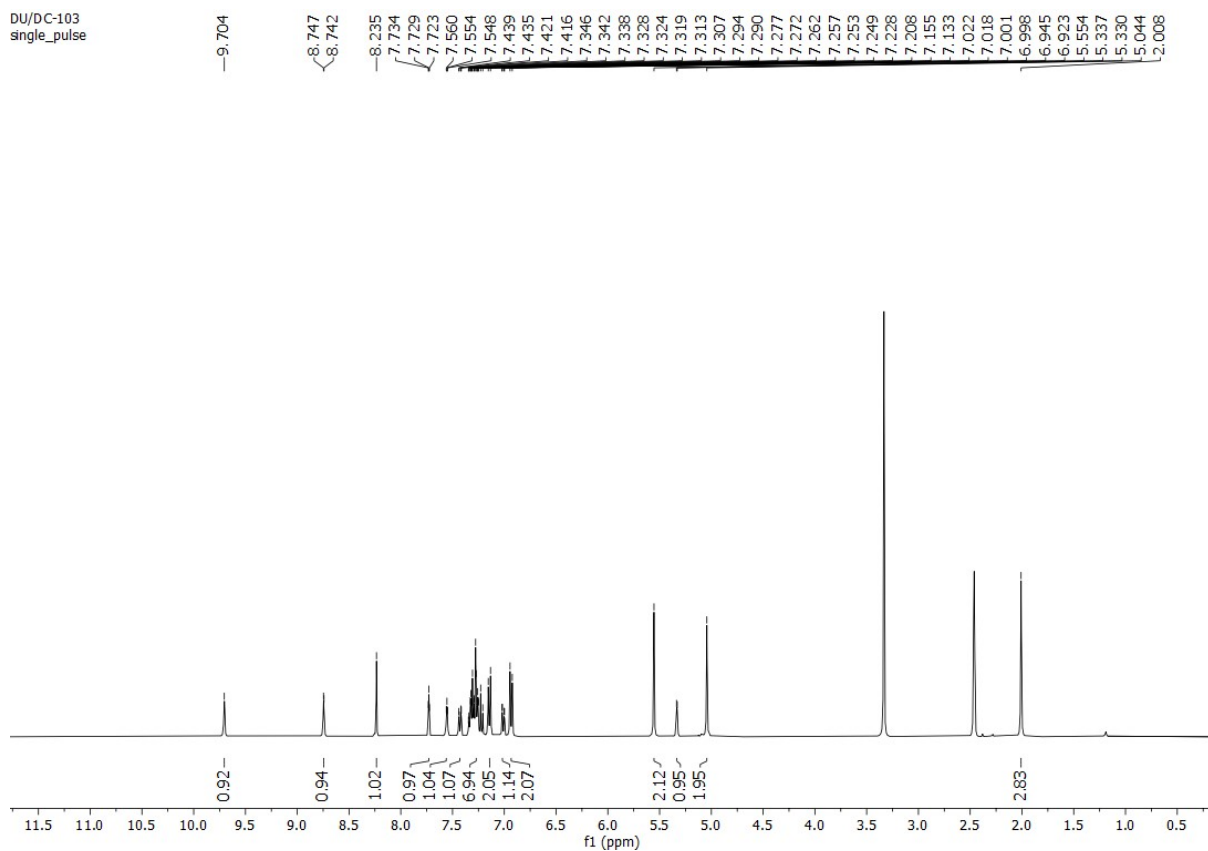

**Figure S7.**  $^1\text{H}$  NMR spectrum of compound **4c** at 400 MHz in DMSO- $d_6$

DU/DC-103  
single pulse decoupled gated NOE

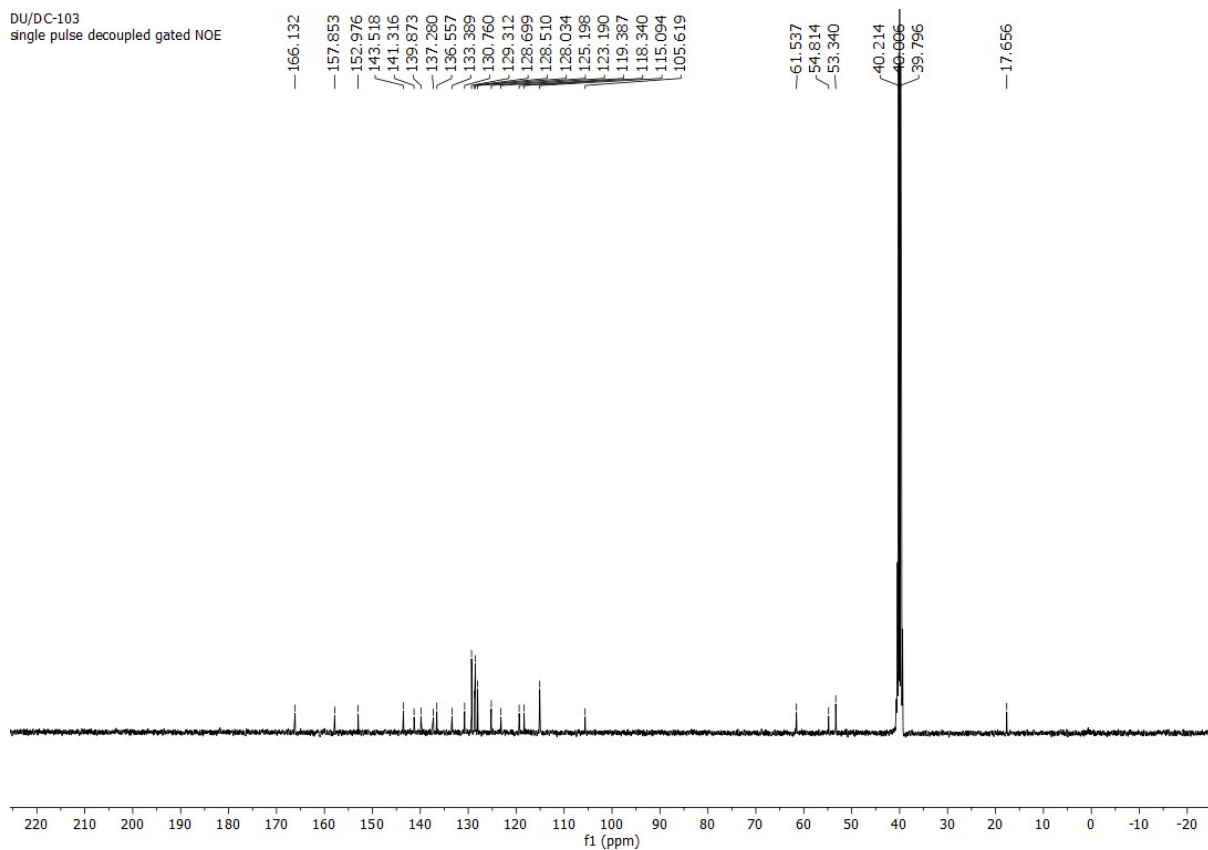

Figure S8.  $^{13}\text{C}$  NMR spectrum of compound **4c** at 150 MHz in  $\text{DMSO-d}_6$

DU/DC-104  
single\_pulse

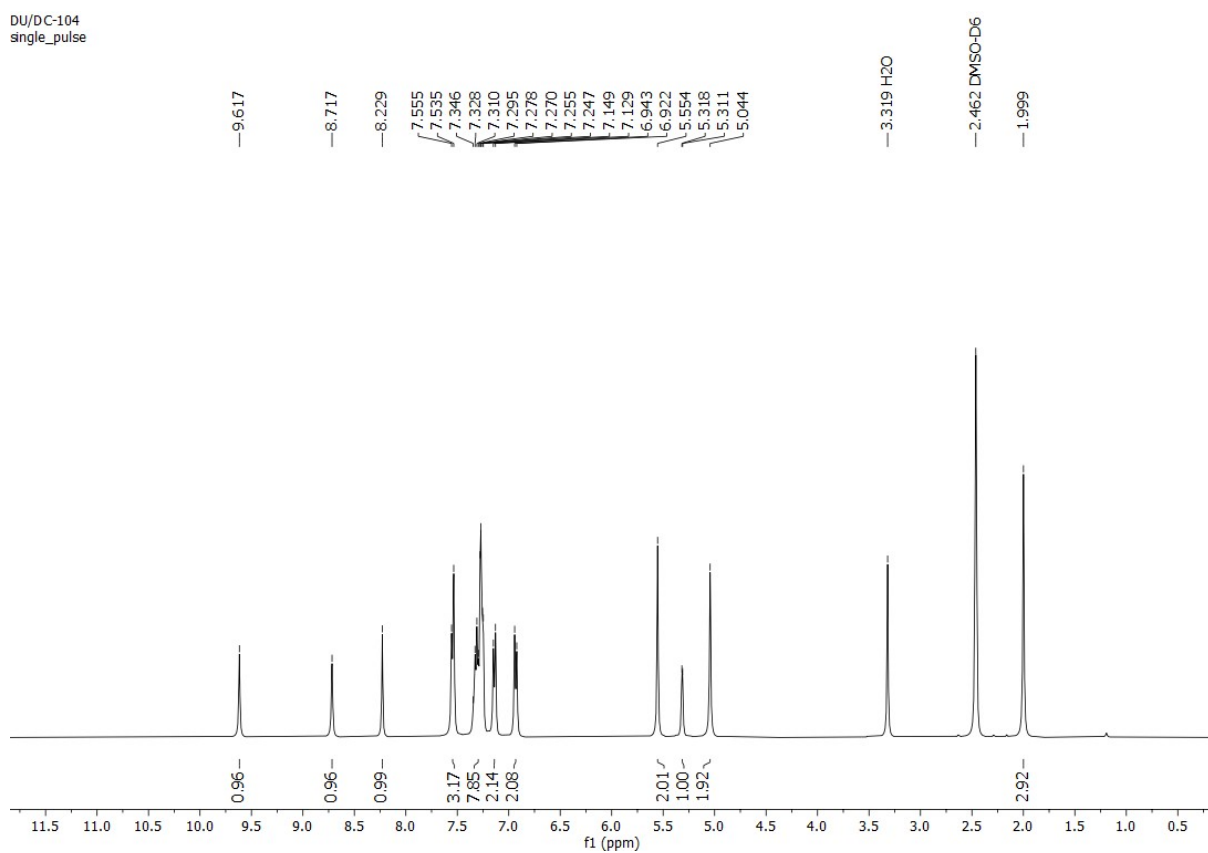

**Figure S9.**  $^1\text{H}$  NMR spectrum of compound **4d** at 400 MHz in DMSO- $d_6$

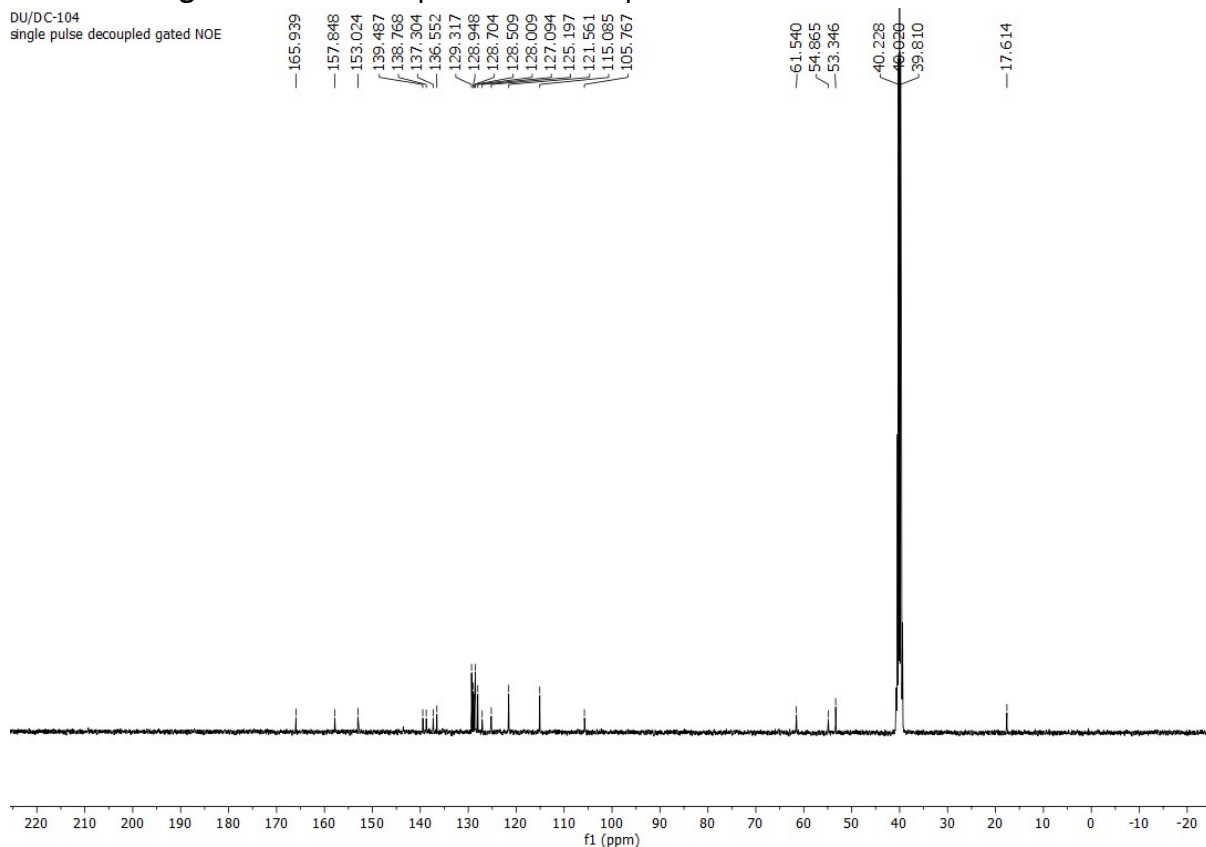

**Figure S10.**  $^{13}\text{C}$  NMR spectrum of compound **4d** at 150 MHz in DMSO- $d_6$

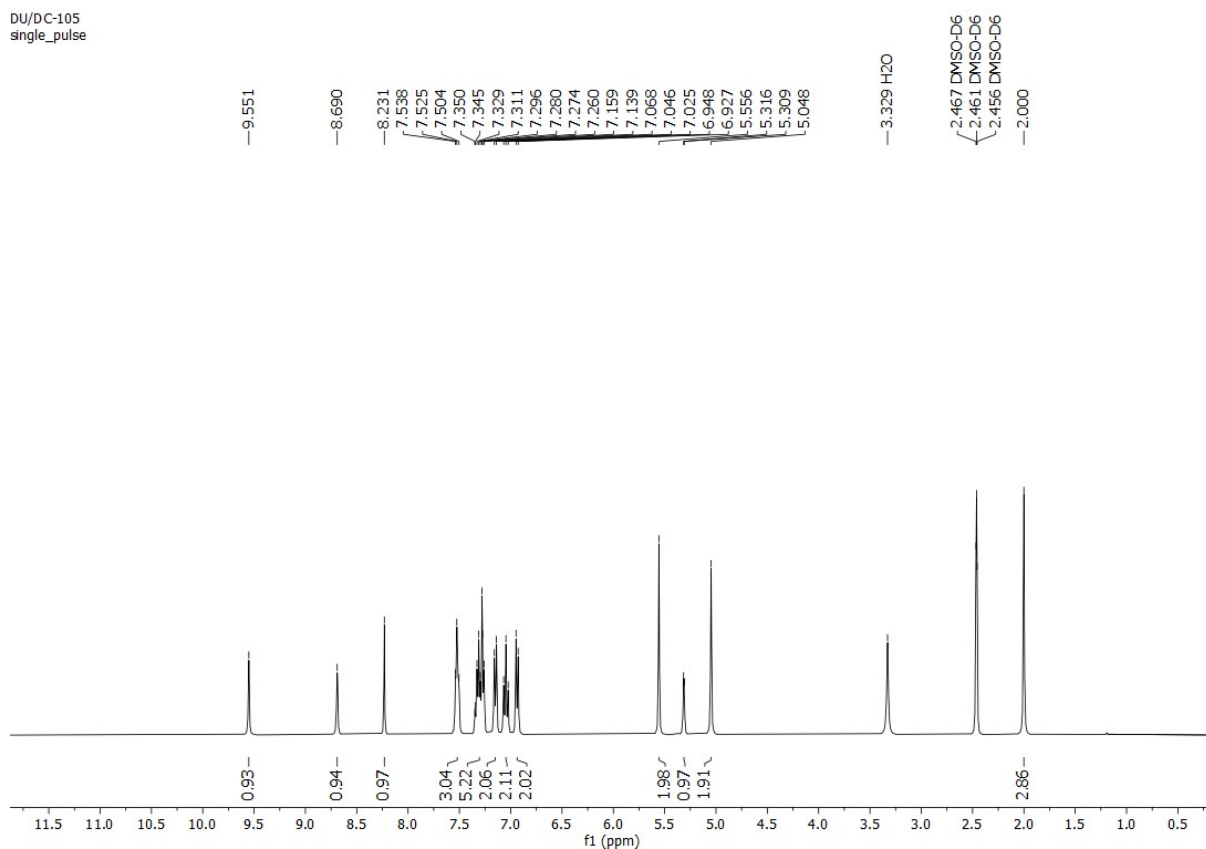

**Figure S11.**  $^1\text{H}$  NMR spectrum of compound **4e** at 400 MHz in DMSO- $d_6$





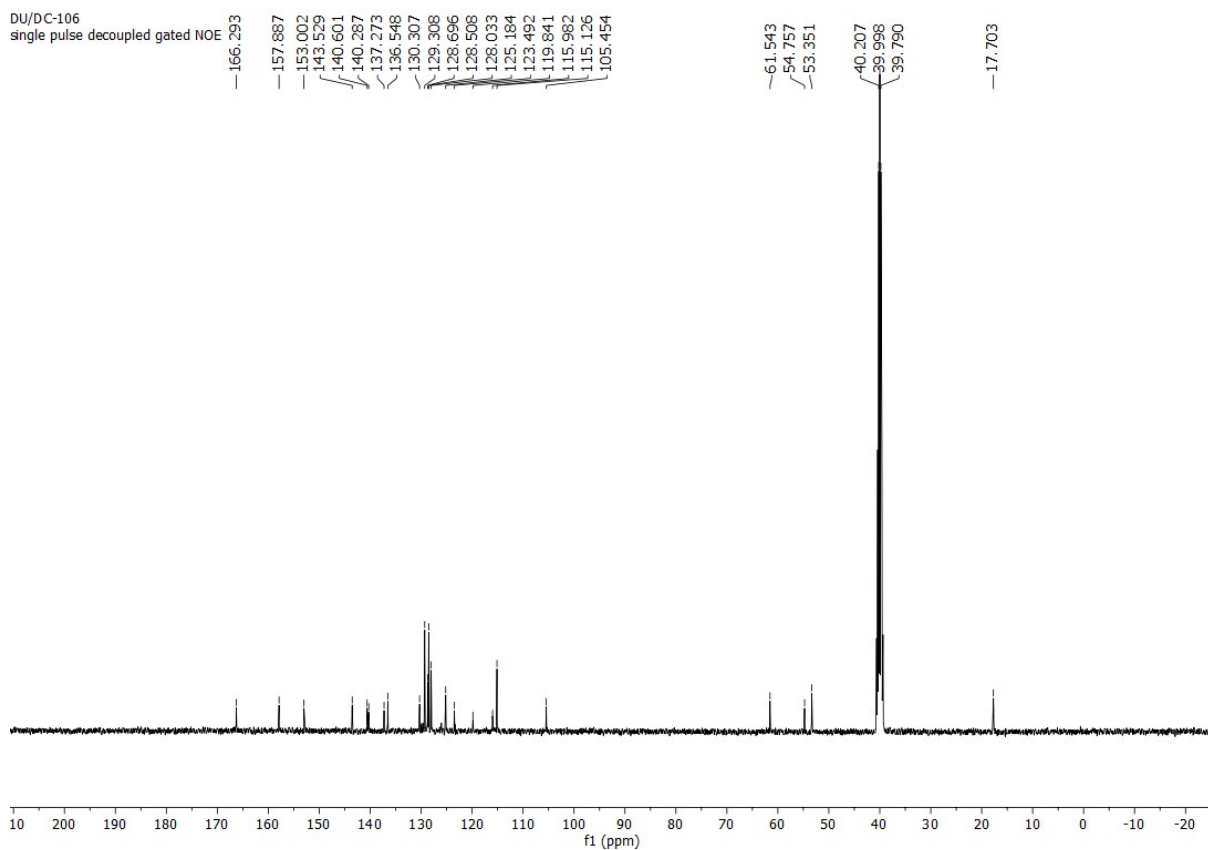

**Figure S14.**  $^{13}\text{C}$  NMR spectrum of compound **4f** at 150 MHz in DMSO- $d_6$

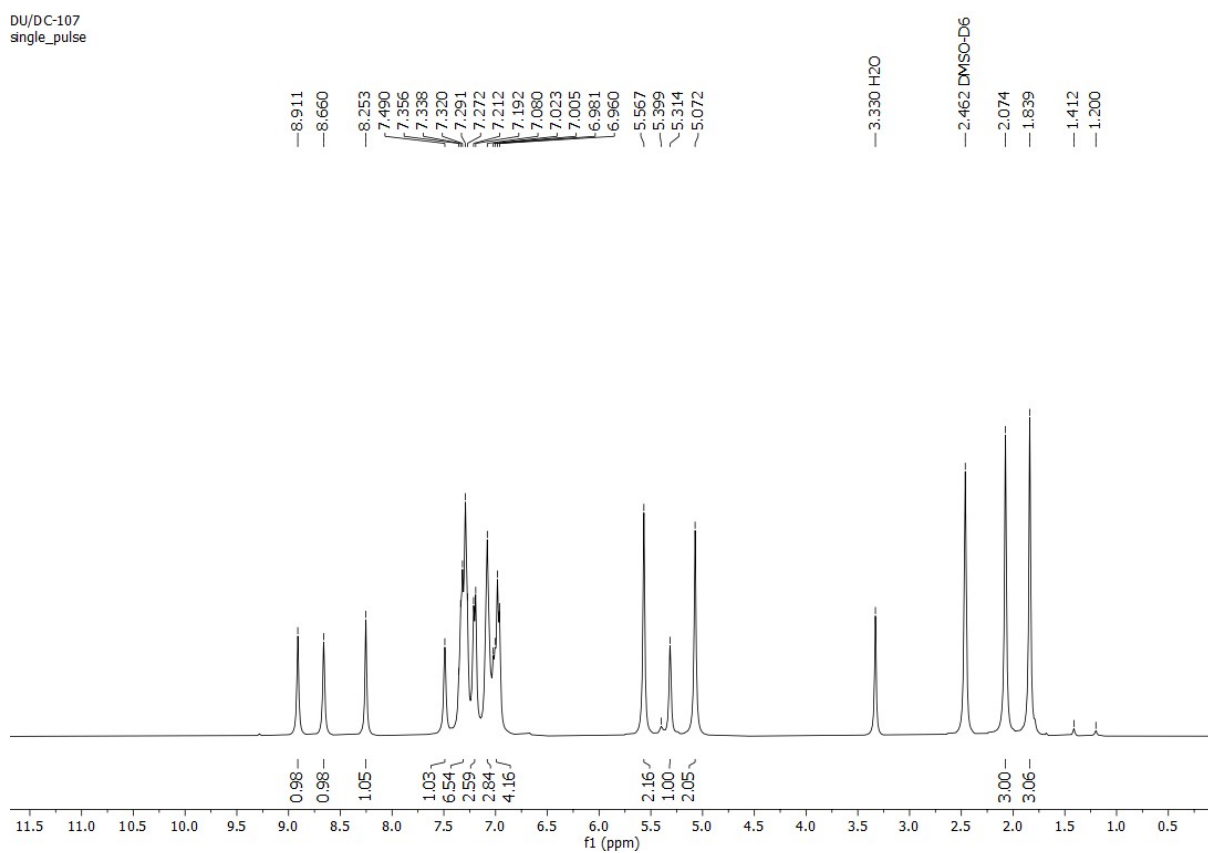

**Figure S15.**  $^1\text{H}$  NMR spectrum of compound **4g** at 400 MHz in DMSO- $d_6$

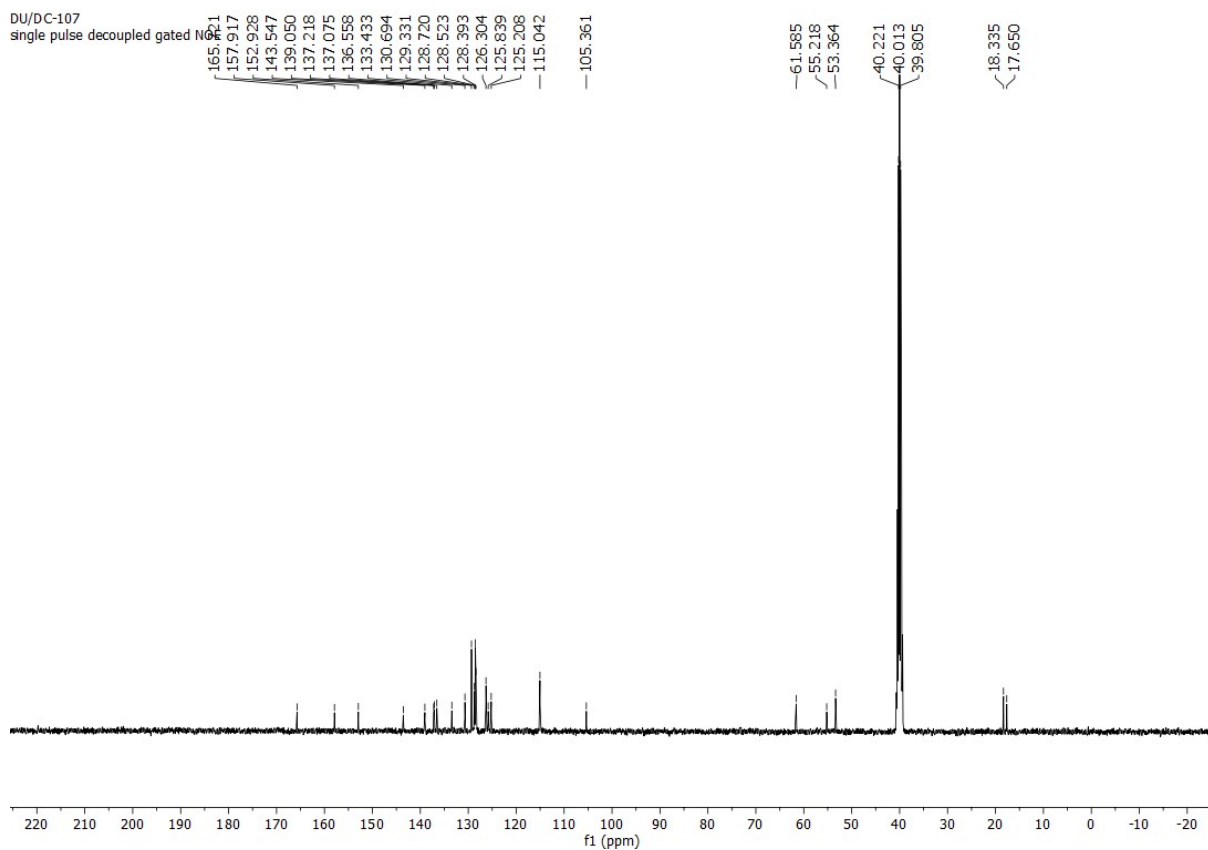

Figure S16.  $^{13}\text{C}$  NMR spectrum of compound **4g** at 150 MHz in DMSO- $d_6$

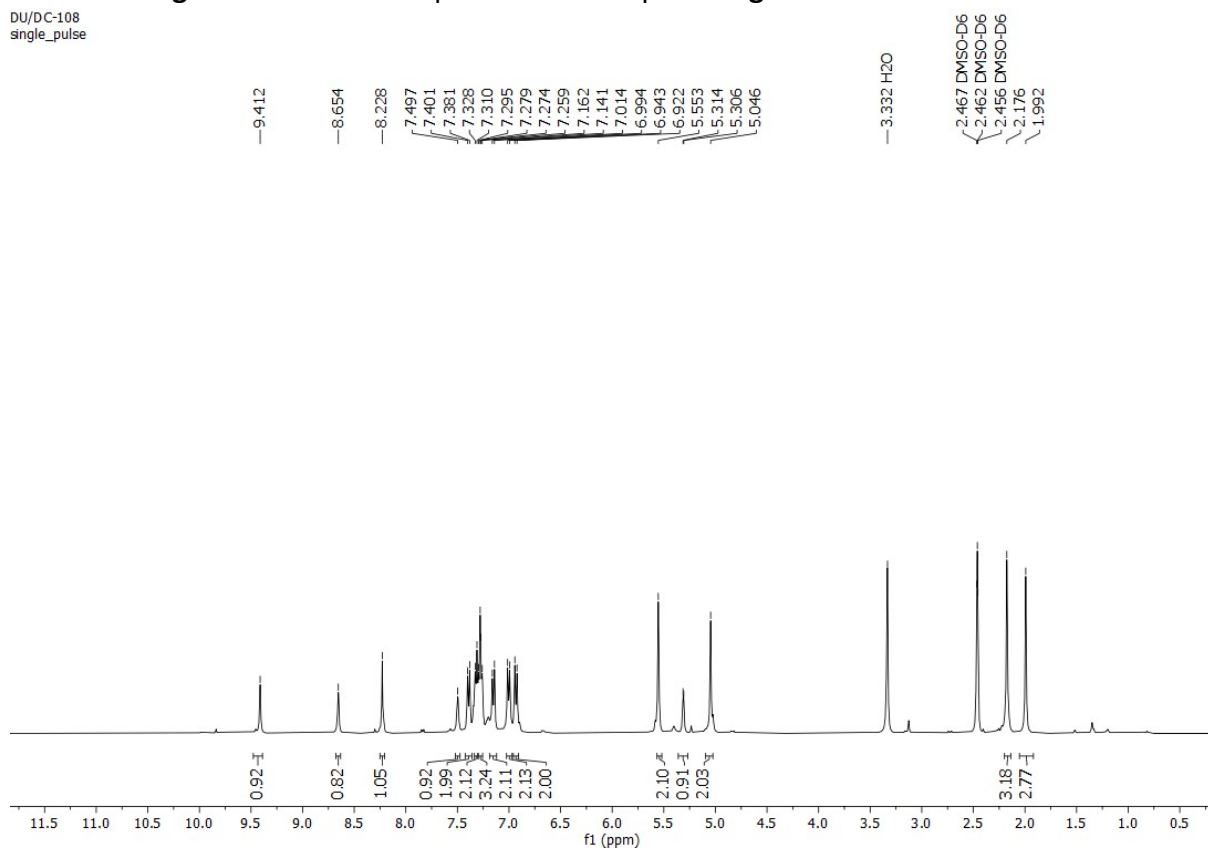

Figure S17.  $^1\text{H}$  NMR spectrum of compound **4h** at 400 MHz in DMSO- $d_6$

DU/DC-108  
single pulse decoupled gated NOE

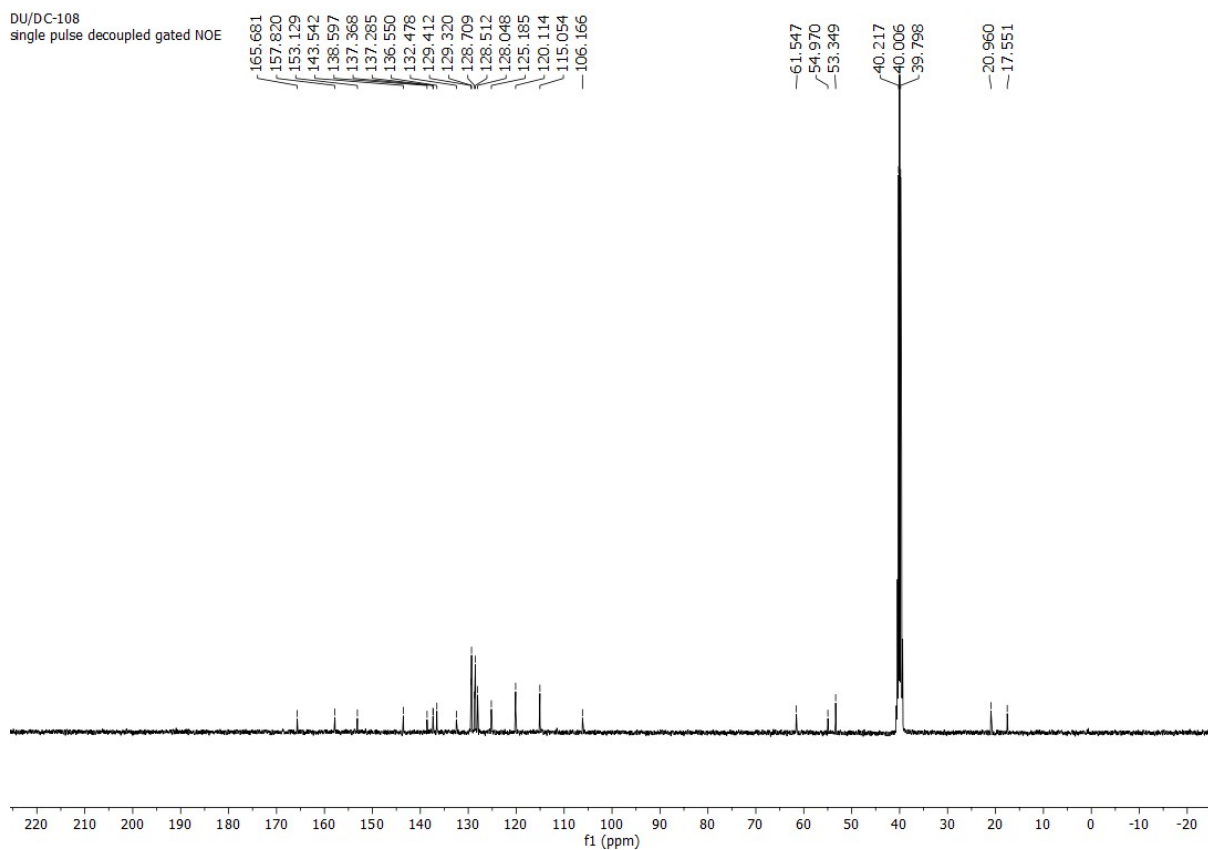

Figure S18. <sup>13</sup>C NMR spectrum of compound **4h** at 150 MHz in DMSO-d<sub>6</sub>

DU/DC-109  
single\_pulse

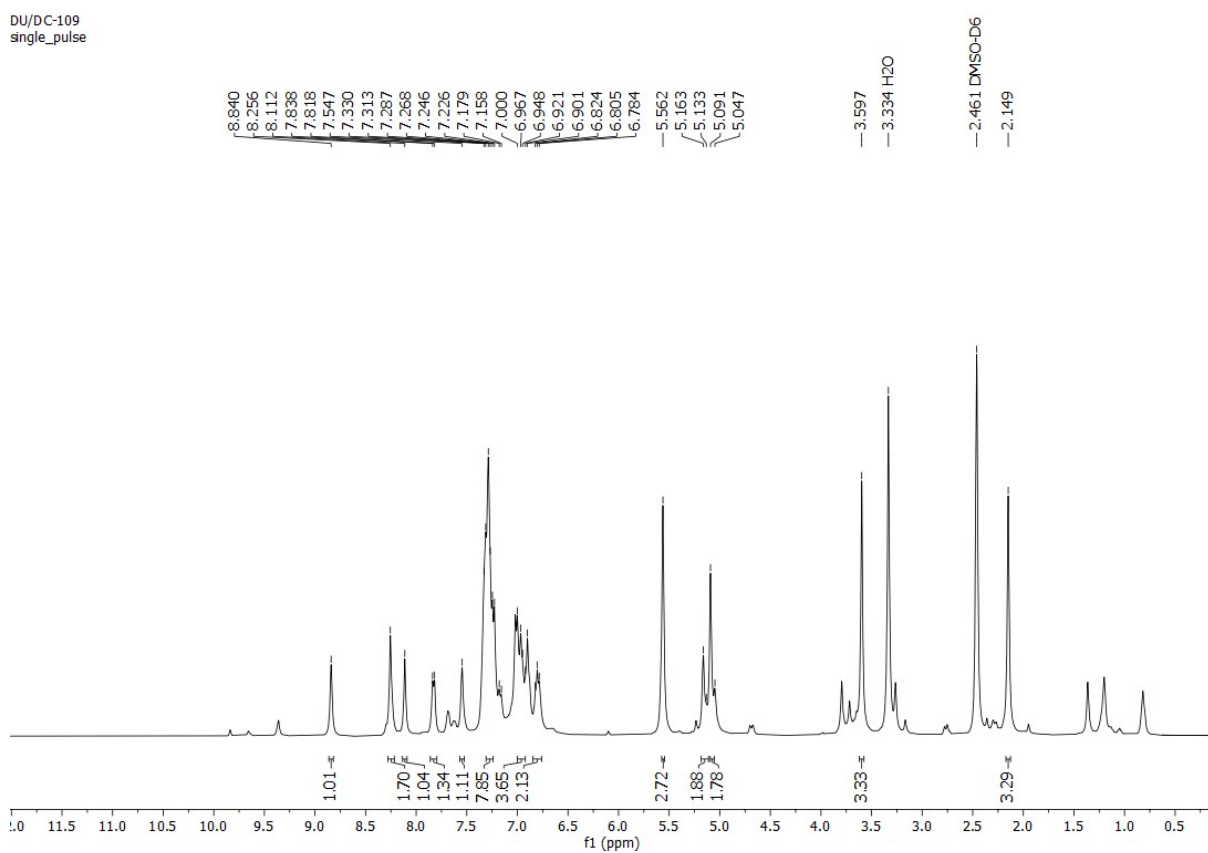

Figure S19. <sup>1</sup>H NMR spectrum of compound 4i at 400 MHz in DMSO-d<sub>6</sub>

DU/DC-109  
single pulse decoupled gated NOE

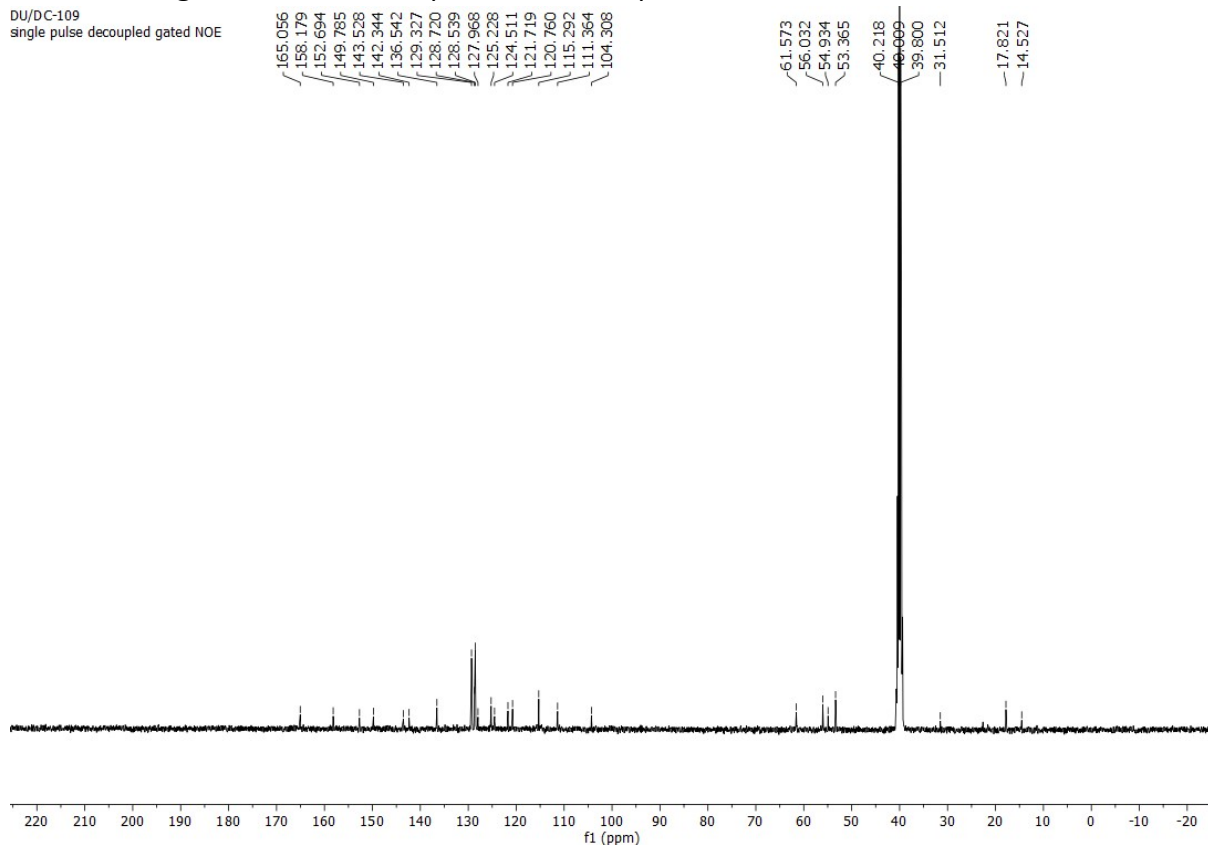

Figure S20. <sup>13</sup>C NMR spectrum of compound 4i at 150 MHz in DMSO-d<sub>6</sub>

DU/DC-110  
single\_pulse

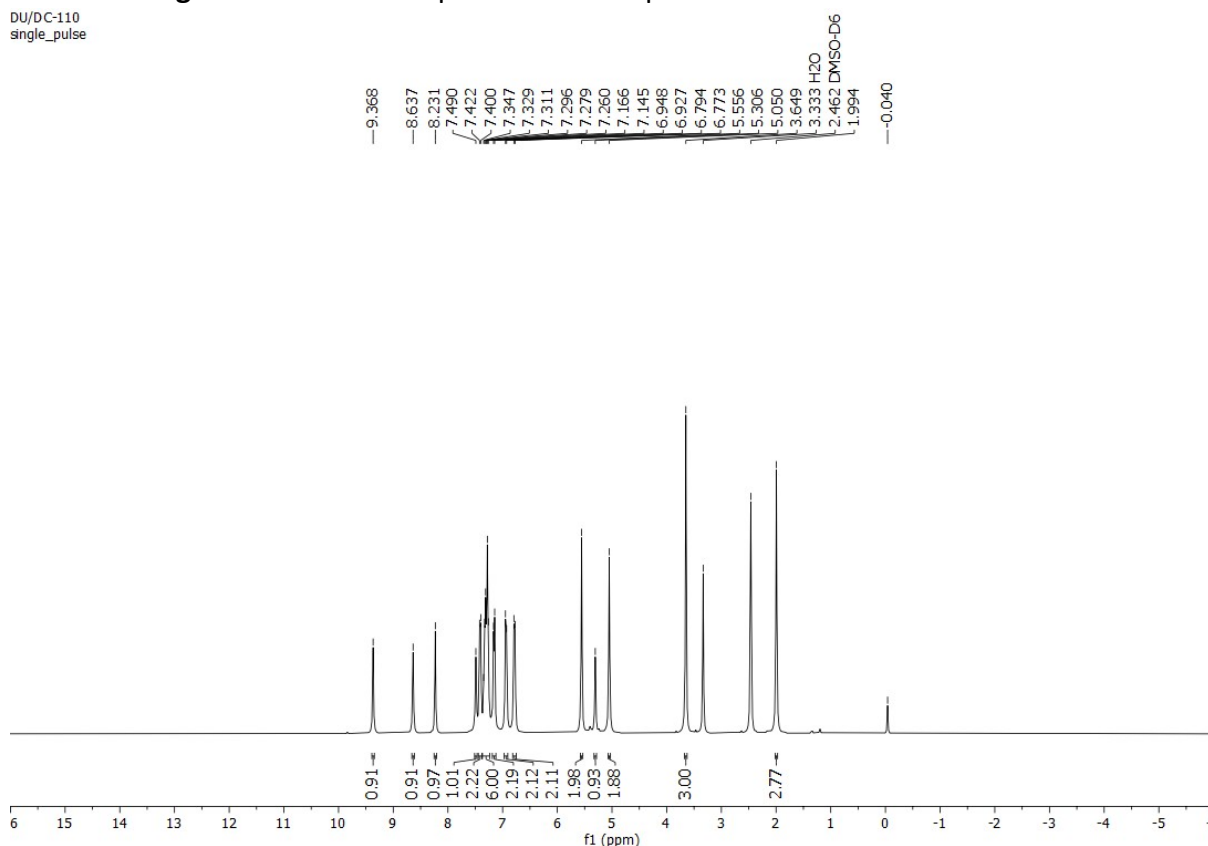

Figure S21. <sup>1</sup>H NMR spectrum of compound 4j at 400 MHz in DMSO-d<sub>6</sub>

DU/DC-110  
single pulse decoupled gated NOE

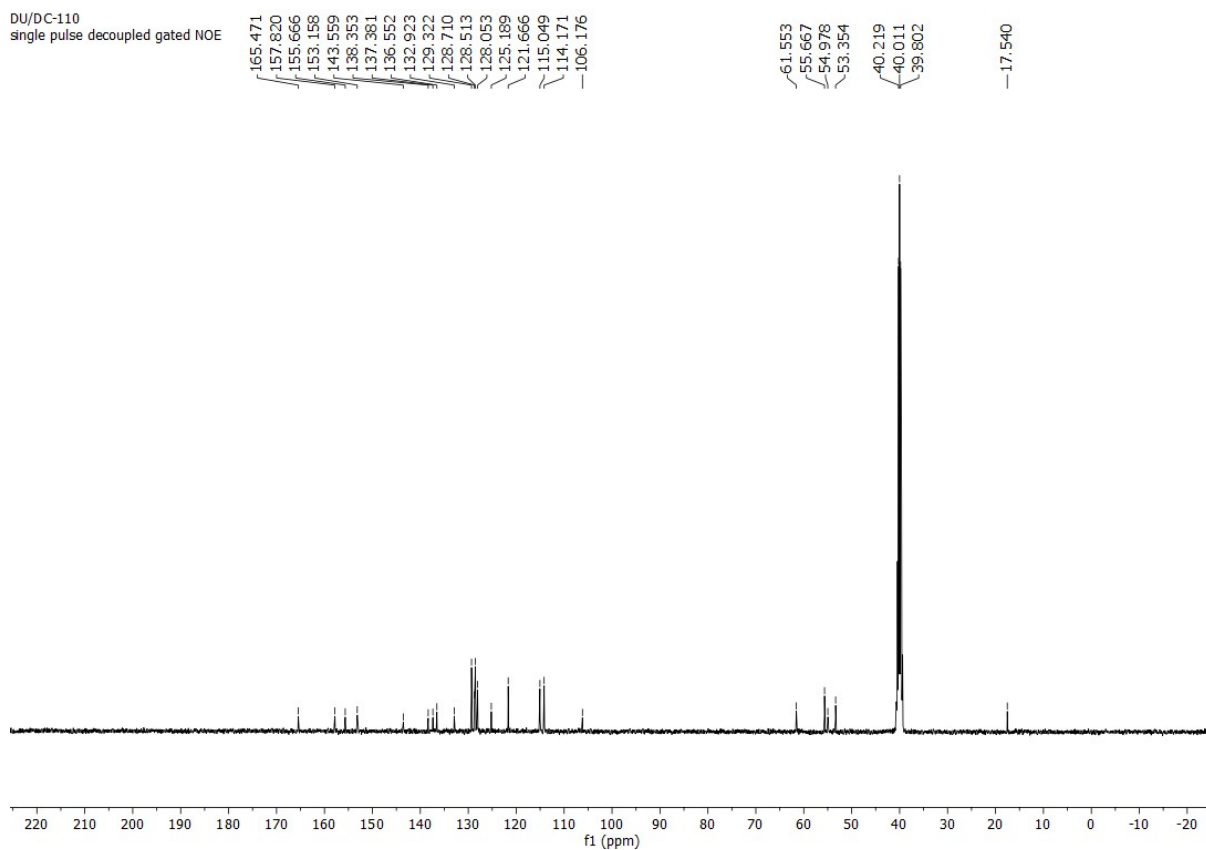

Figure S22.  $^{13}\text{C}$  NMR spectrum of compound **4j** at 150 MHz in  $\text{DMSO-d}_6$

DU/DC-201  
single\_pulse

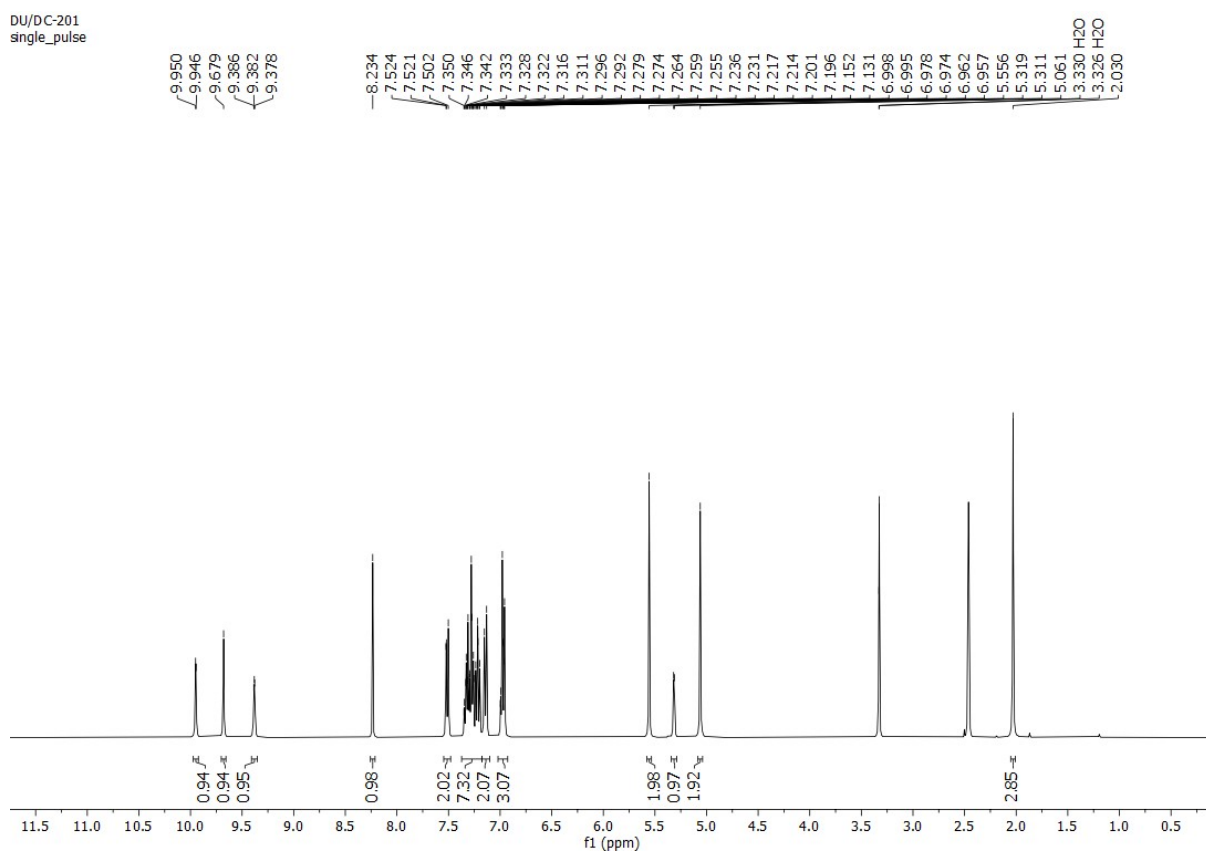

Figure S23.  $^1\text{H}$  NMR spectrum of compound **4k** at 400 MHz in  $\text{DMSO-d}_6$

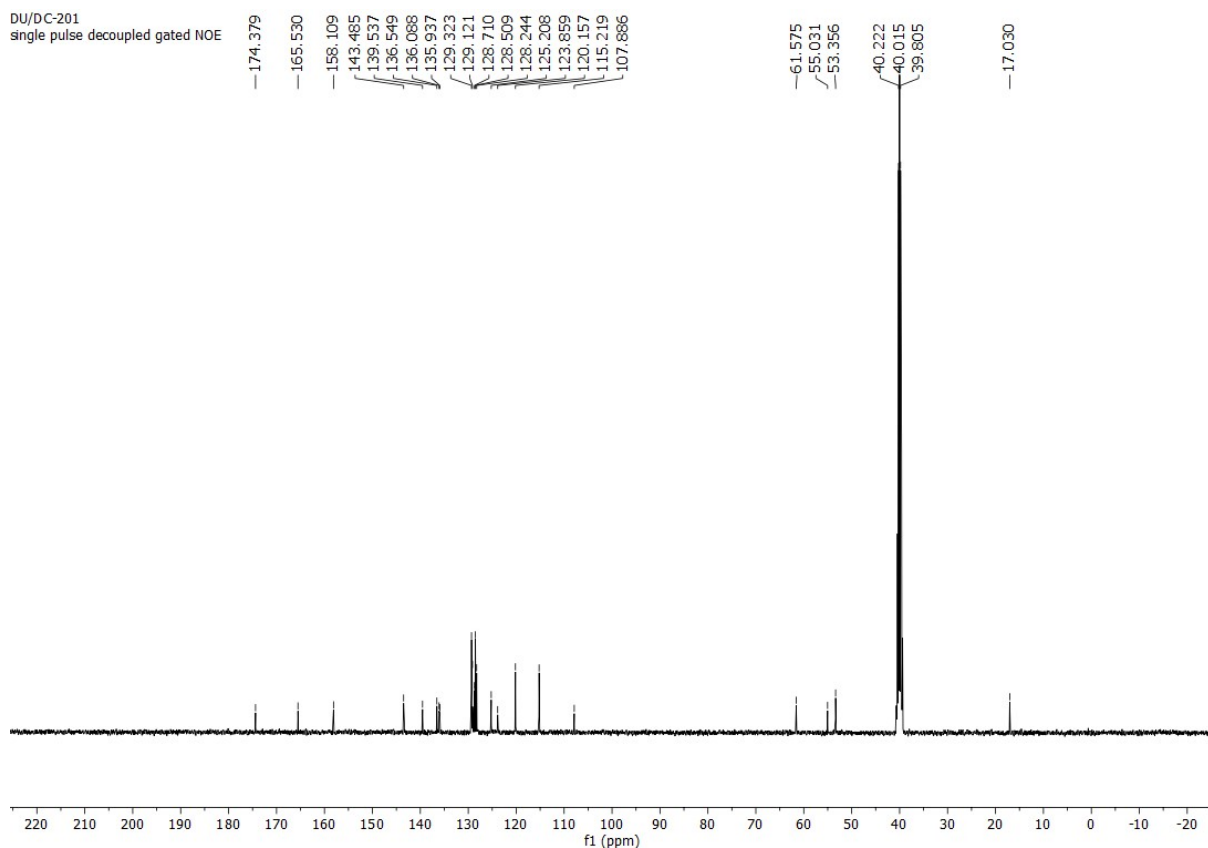

Figure S24.  $^{13}\text{C}$  NMR spectrum of compound **4k** at 150 MHz in DMSO- $d_6$

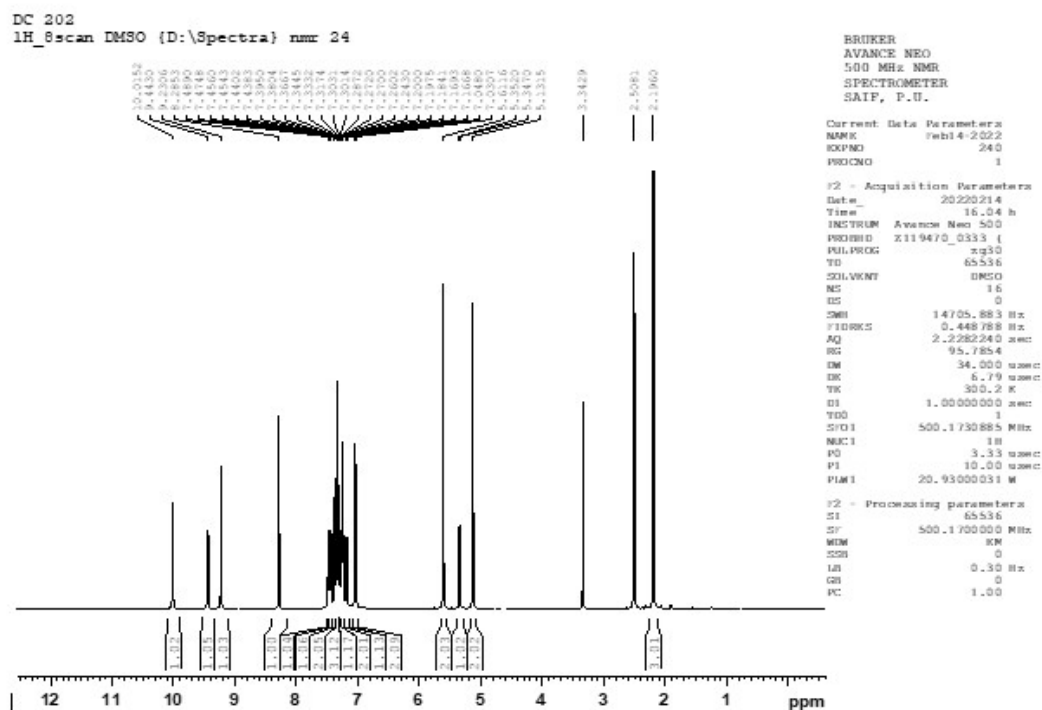

Figure S25.  $^1\text{H}$  NMR spectrum of compound **4l** at 400 MHz in DMSO- $d_6$

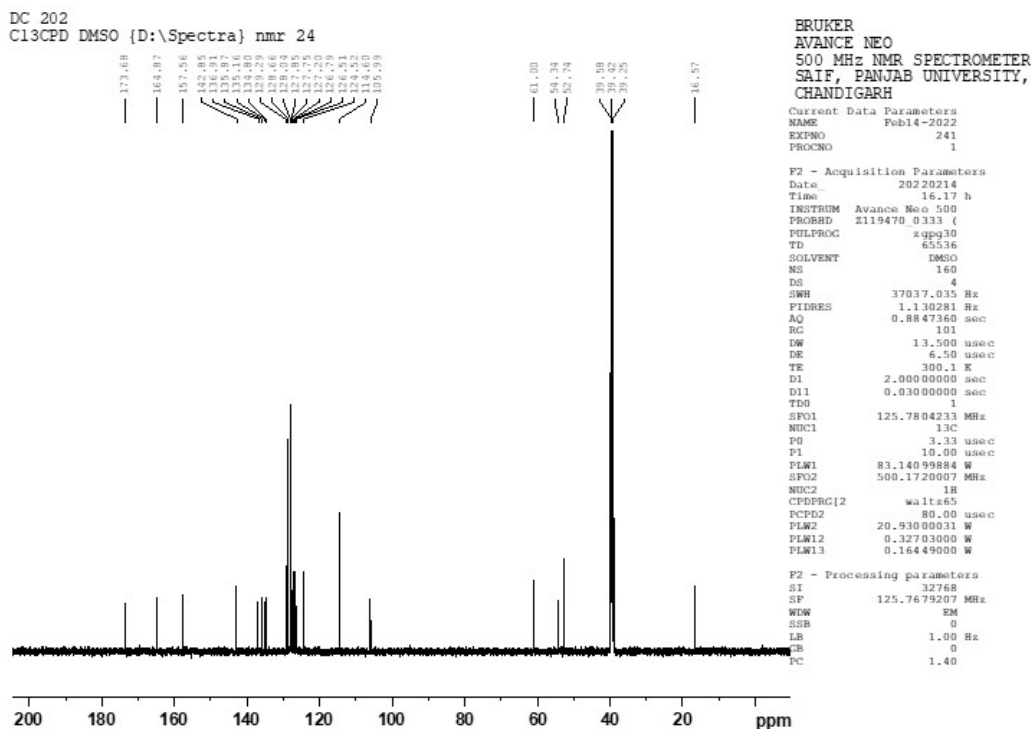

Figure S26.  $^{13}\text{C}$  NMR spectrum of compound **4l** at 150 MHz in DMSO- $d_6$

DU/DC-203  
single\_pulse

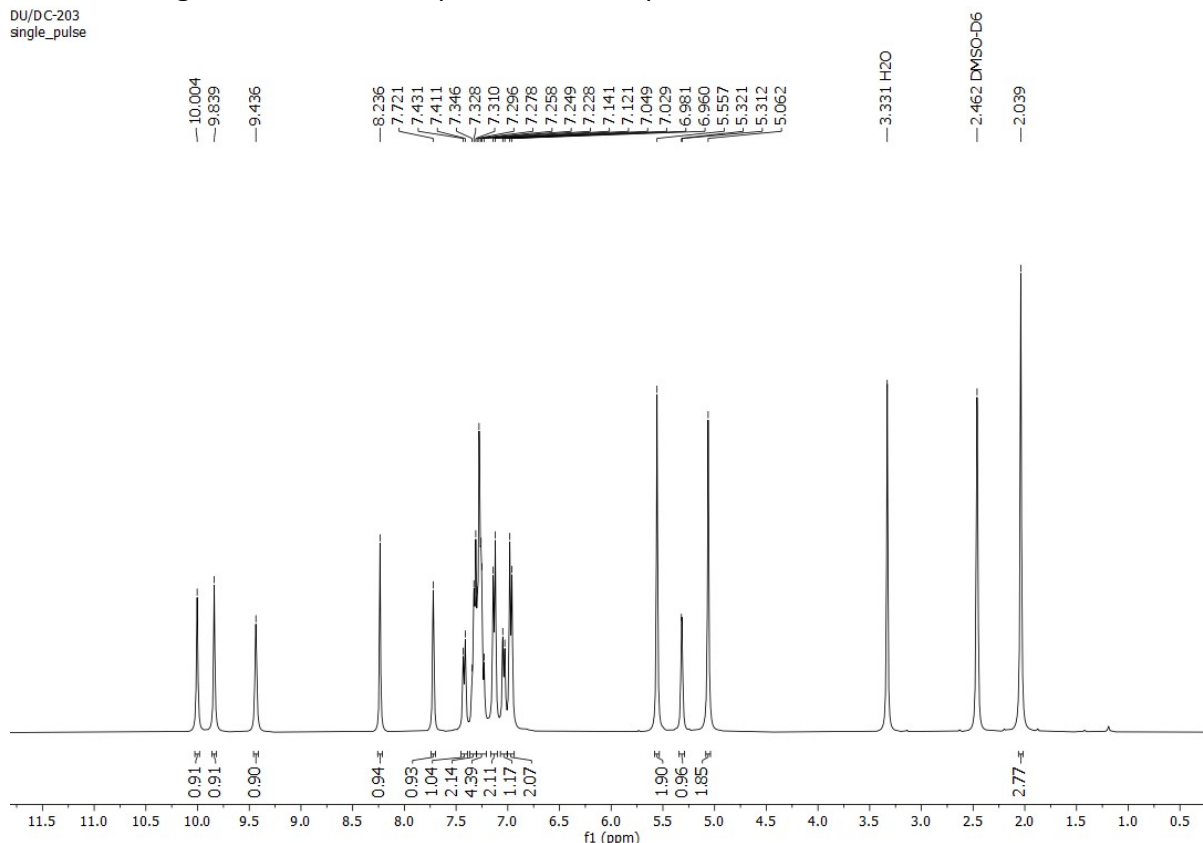

Figure S27.  $^1\text{H}$  NMR spectrum of compound **4m** at 400 MHz in DMSO- $d_6$

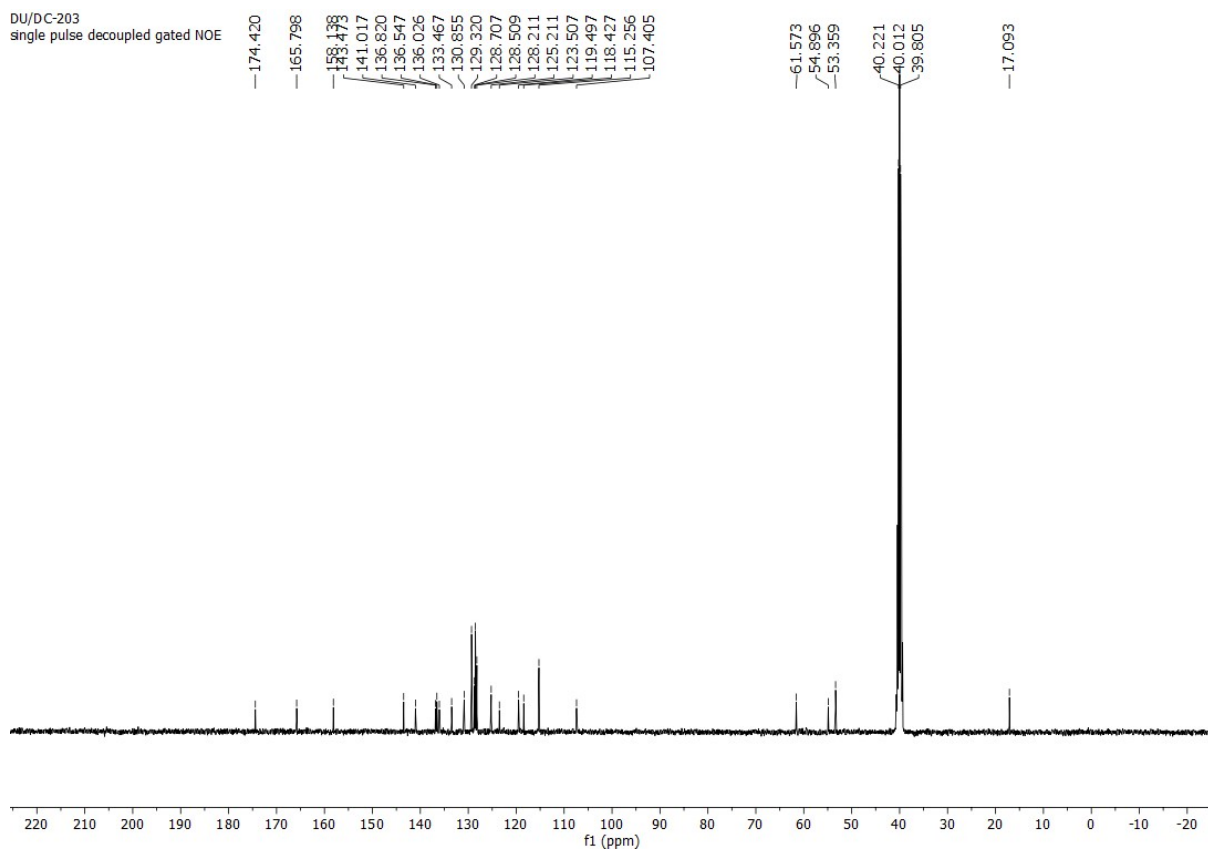

Figure S28.  $^{13}\text{C}$  NMR spectrum of compound **4m** at 150 MHz in DMSO- $d_6$

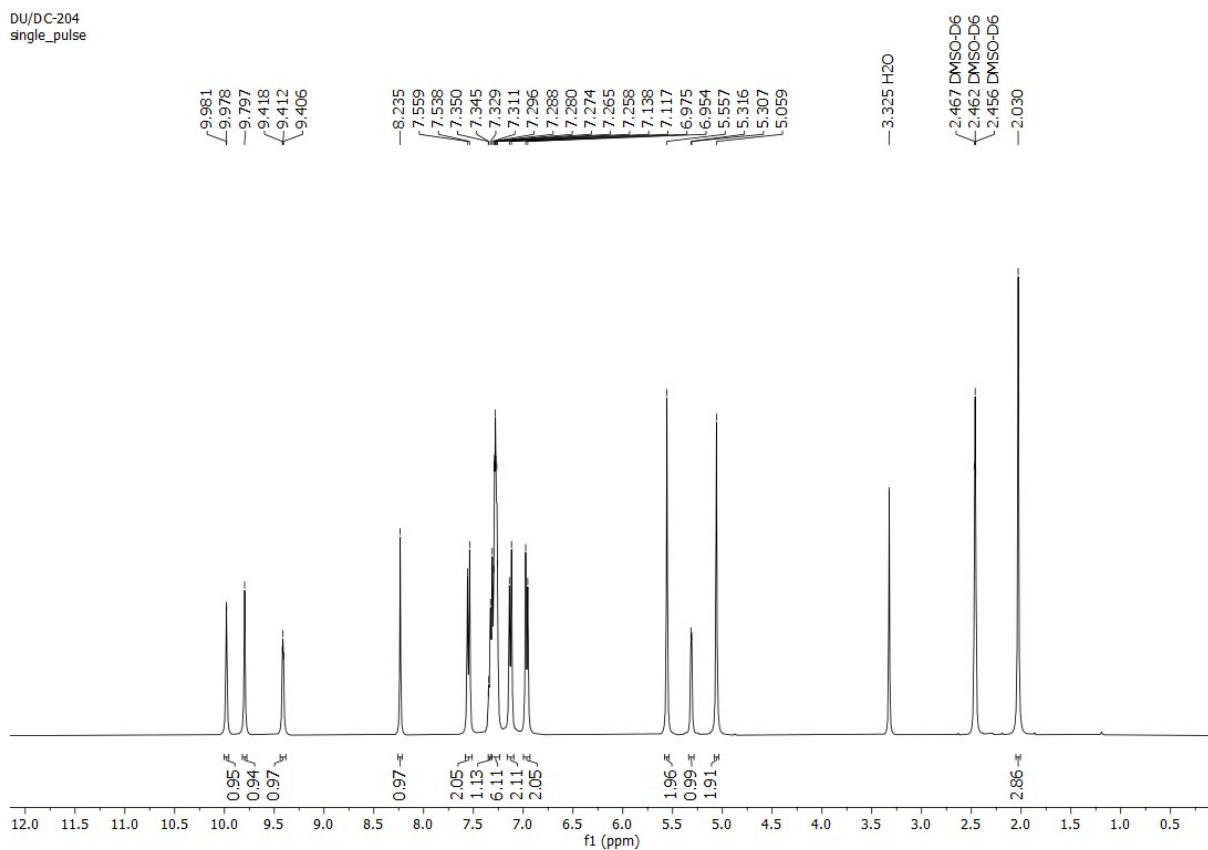

Figure S29.  $^1\text{H}$  NMR spectrum of compound **4n** at 400 MHz in DMSO- $d_6$



DU/DC-204  
single pulse decoupled gated NOE

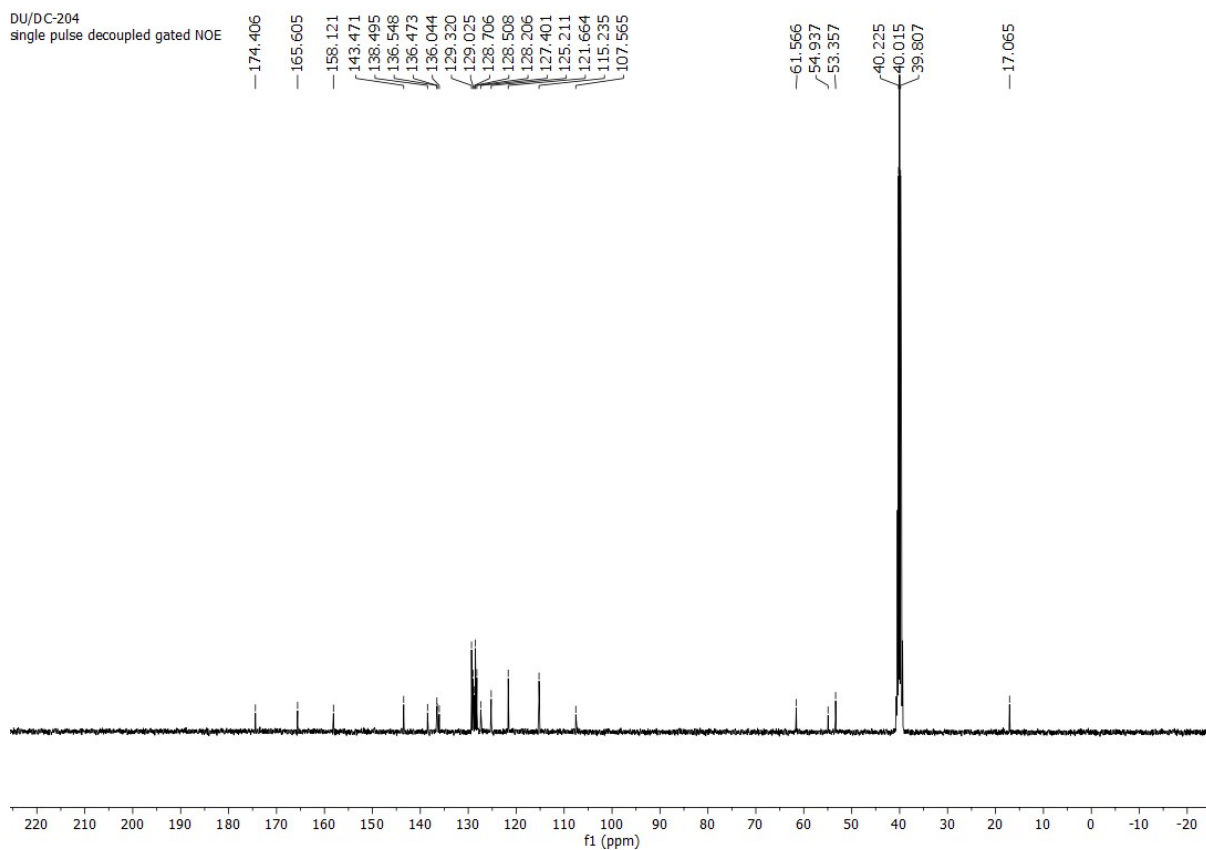

Figure S30.  $^{13}\text{C}$  NMR spectrum of compound **4n** at 150 MHz in DMSO- $d_6$

DU/DC-205  
single\_pulse

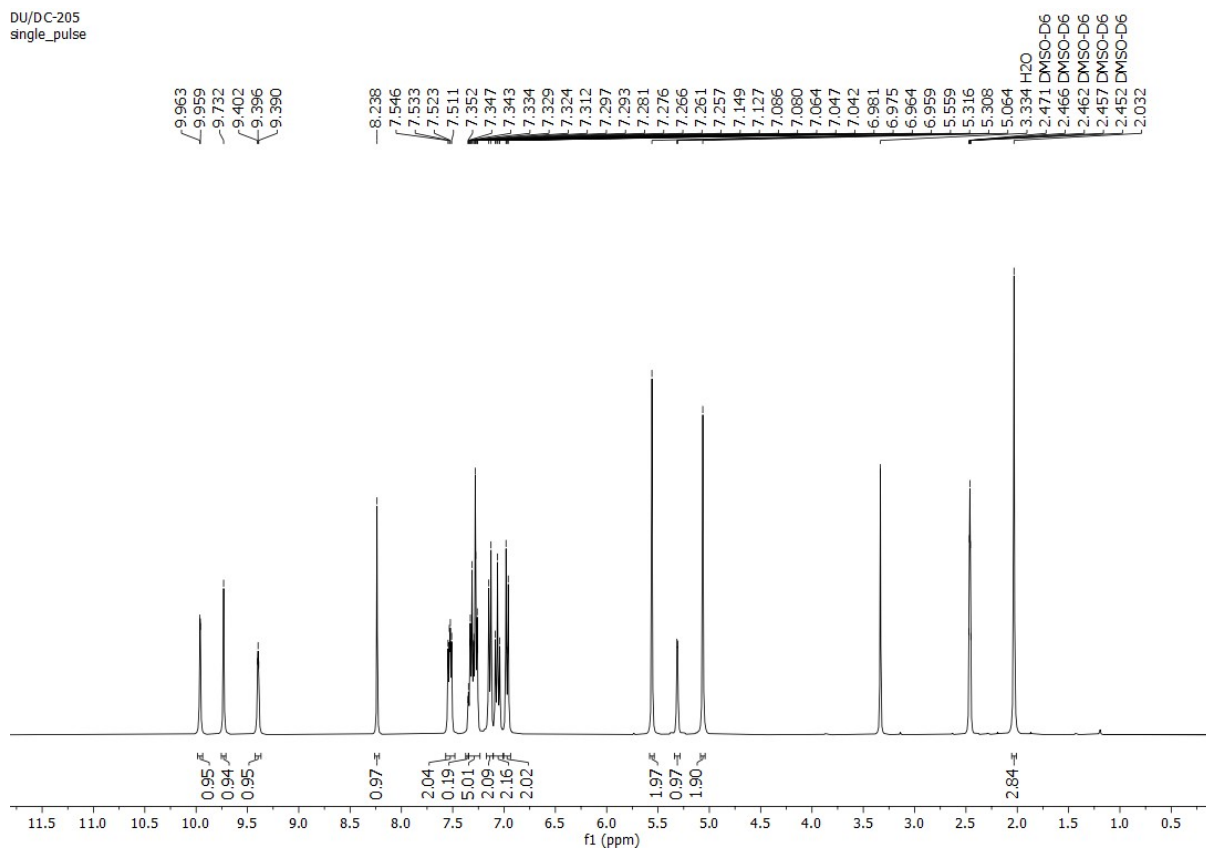

Figure S31.  $^1\text{H}$  NMR spectrum of compound **4o** at 400 MHz in DMSO- $d_6$

DU/DC-205  
single pulse decoupled gated NOE

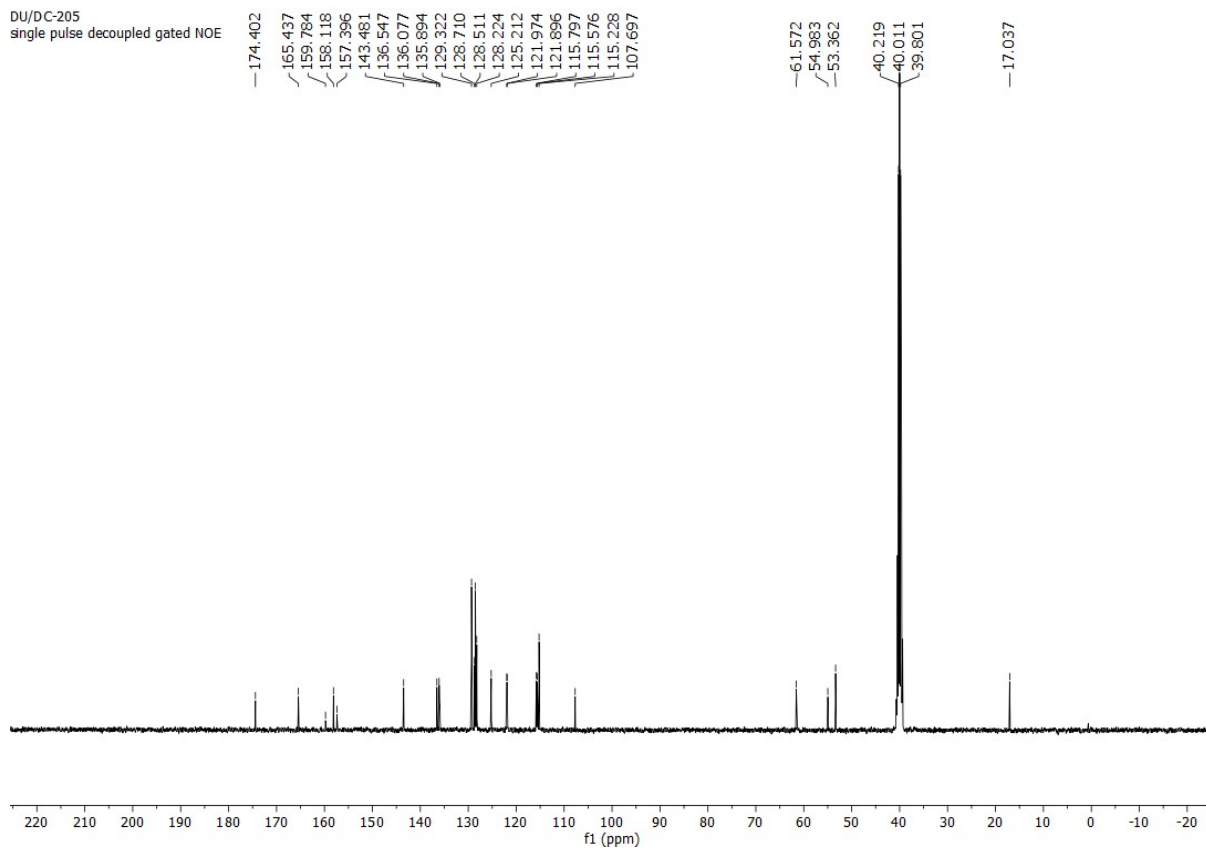

Figure S32.  $^{13}\text{C}$  NMR spectrum of compound **4o** at 150 MHz in DMSO- $d_6$

DU/DC-206  
single\_pulse

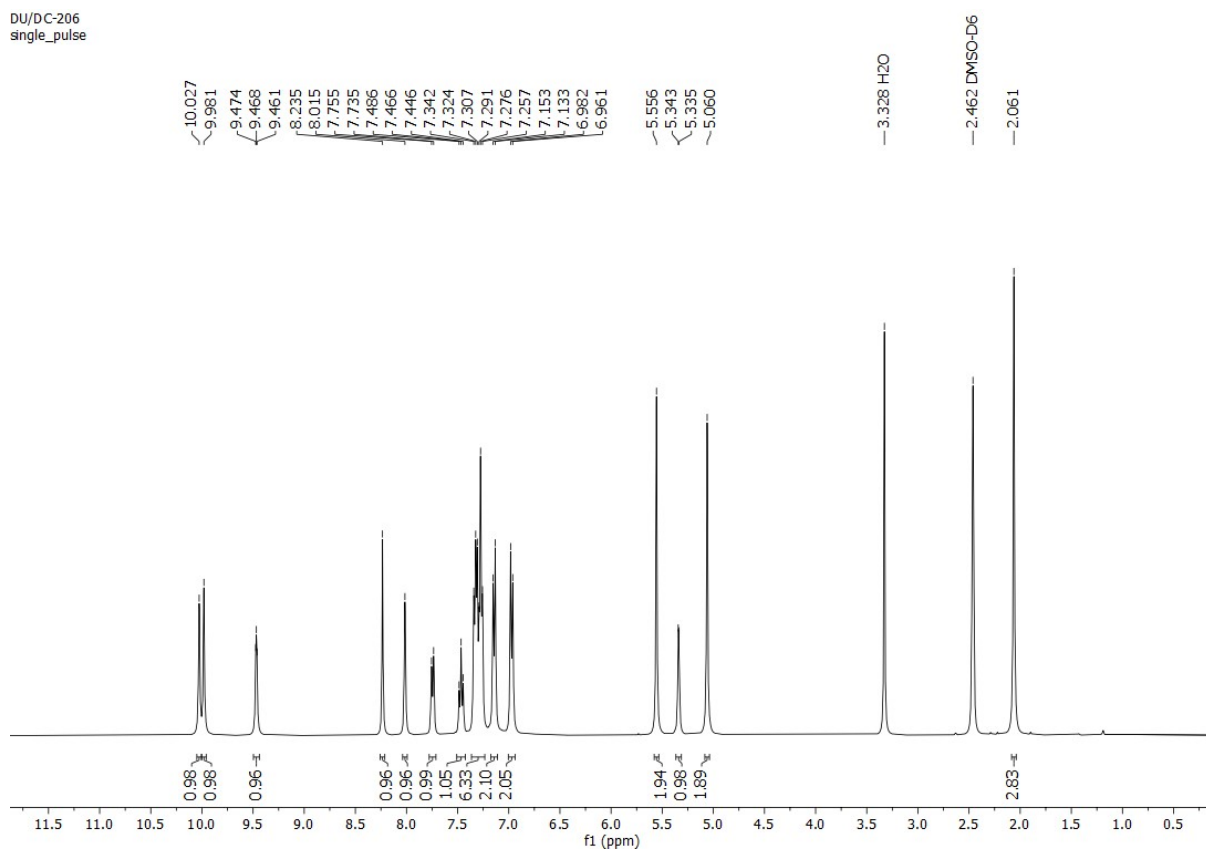

Figure S33.  $^1\text{H}$  NMR spectrum of compound **4p** at 400 MHz in DMSO- $d_6$

DUJDC-206  
single pulse decoupled gated NOE

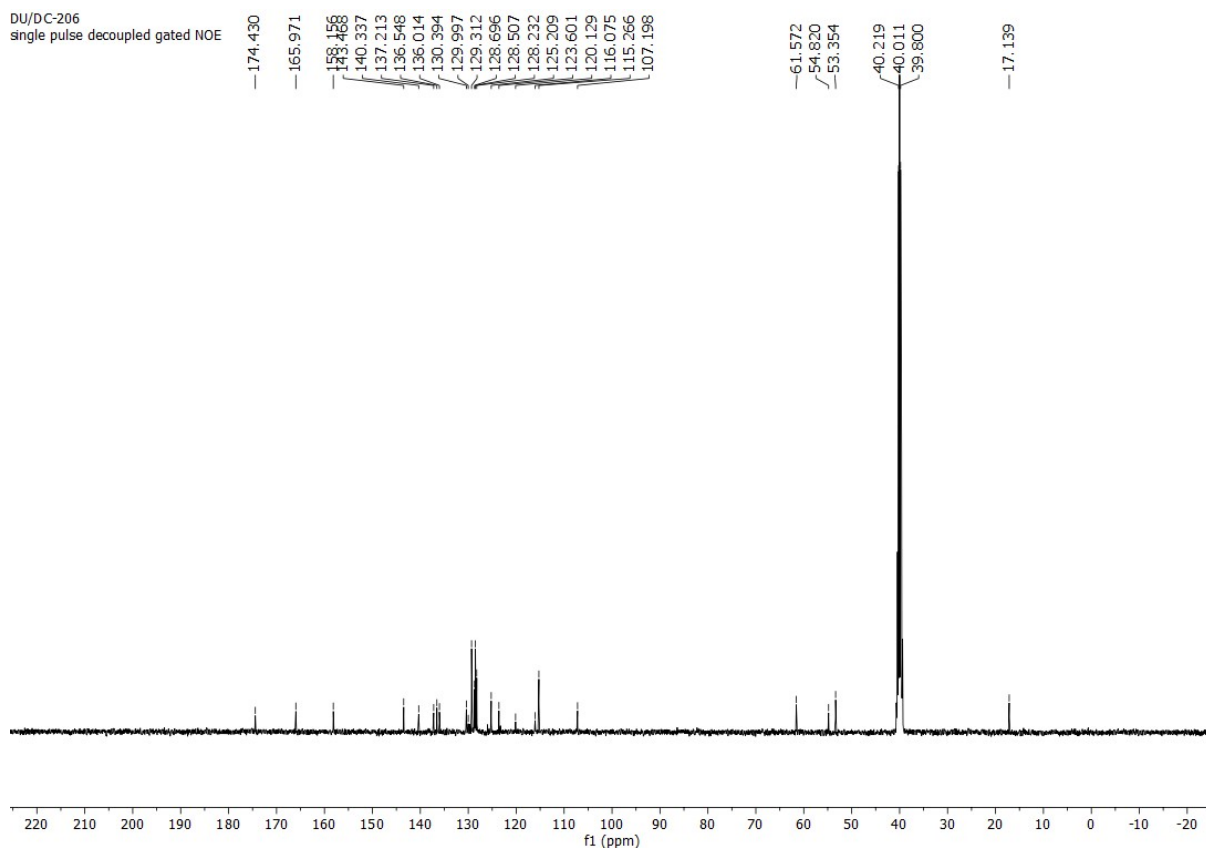

Figure S34.  $^{13}\text{C}$  NMR spectrum of compound **4p** at 150 MHz in DMSO- $d_6$

DUJDC-207  
single\_pulse

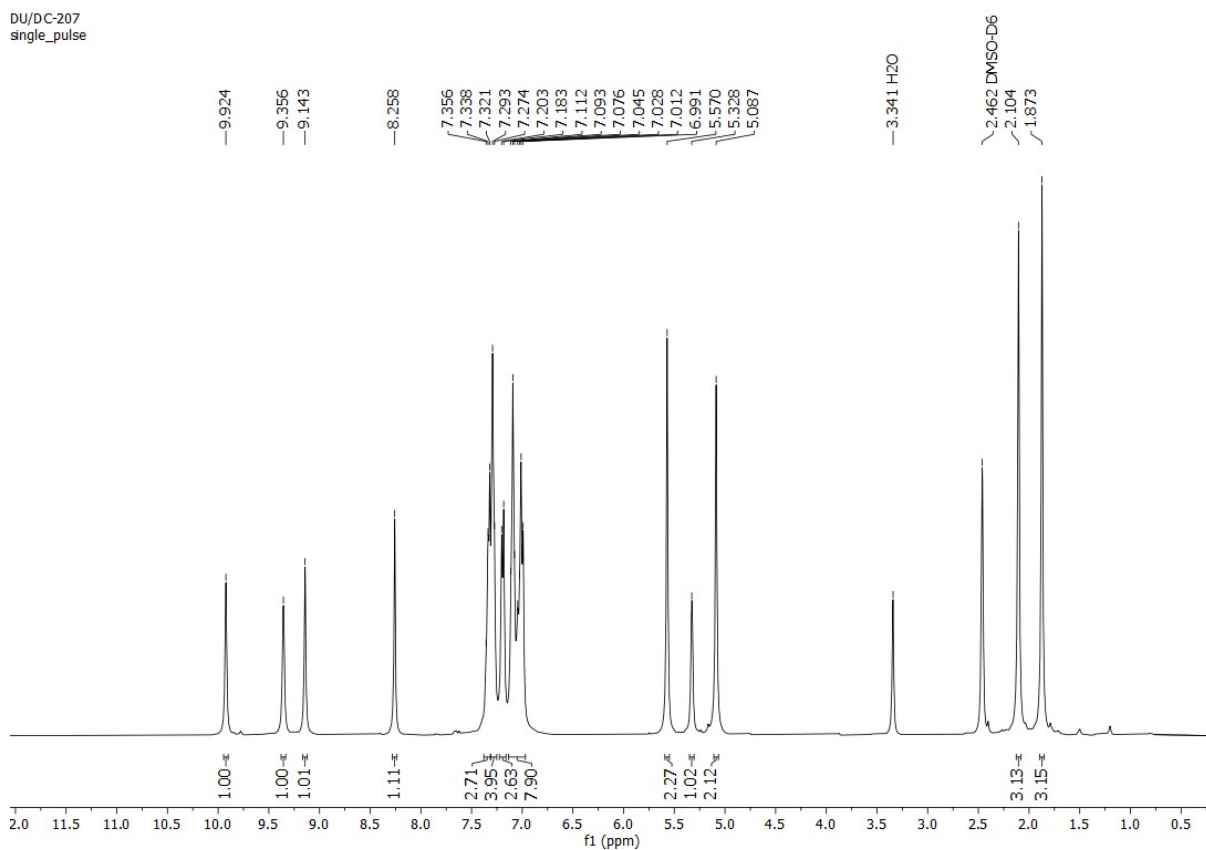

Figure S35.  $^1\text{H}$  NMR spectrum of compound **4q** at 400 MHz in DMSO- $d_6$

DU/DC-207  
single pulse decoupled gated NOE

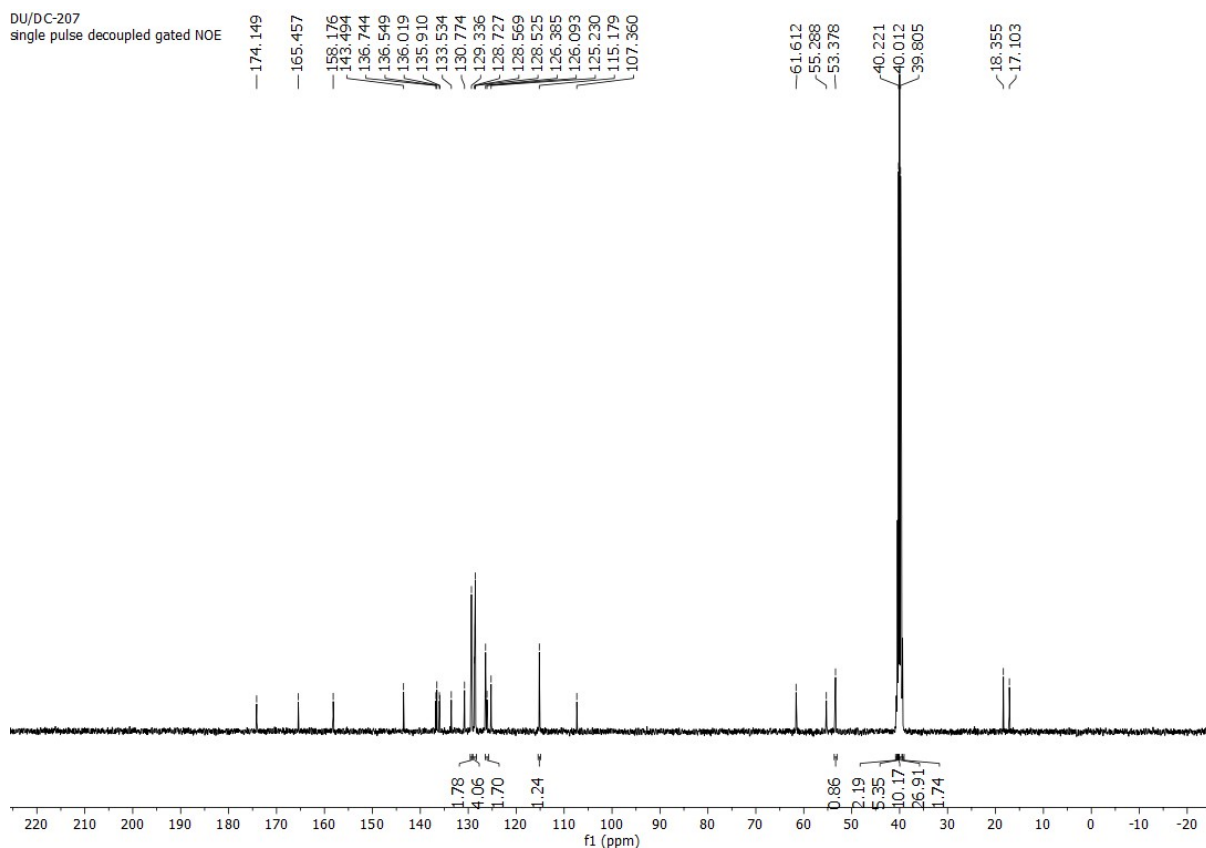

Figure S36.  $^{13}\text{C}$  NMR spectrum of compound **4q** at 150 MHz in DMSO- $d_6$

DU/DC-208  
single\_pulse

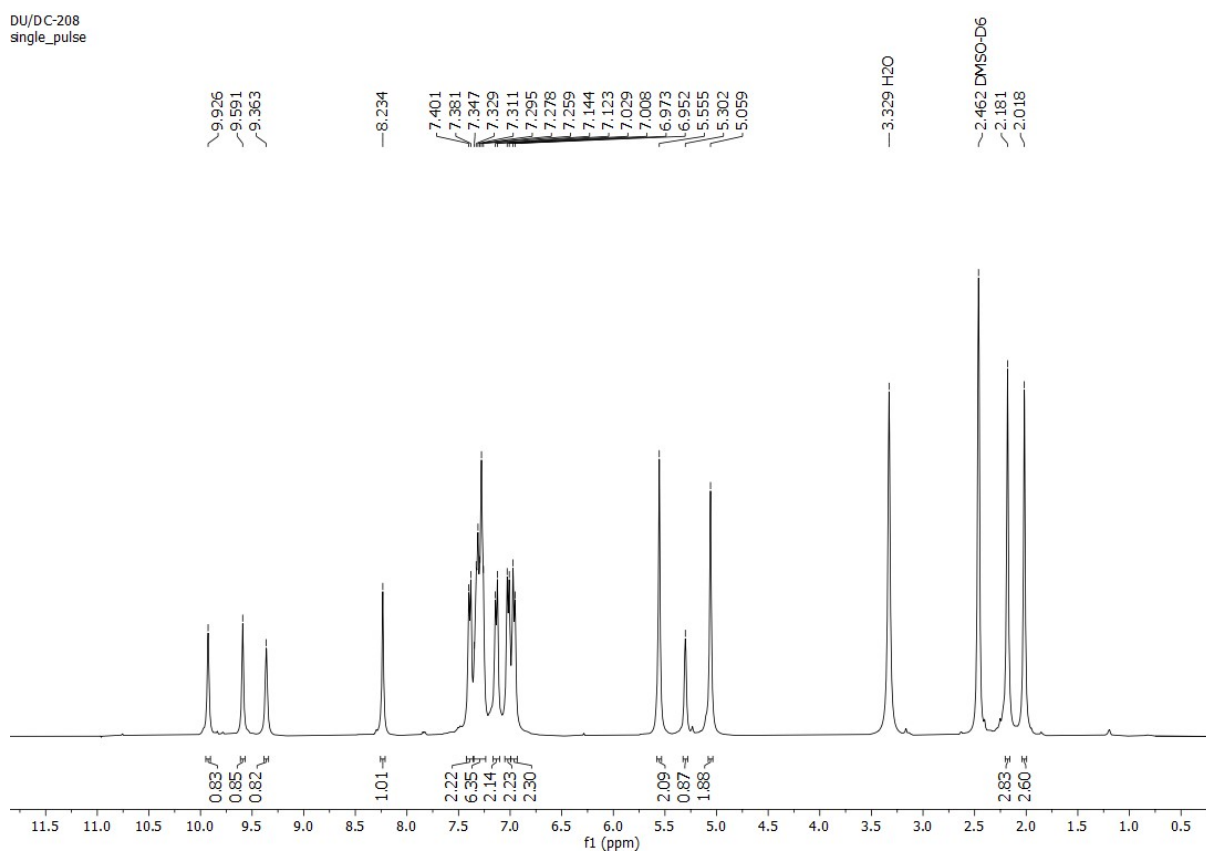

Figure S37.  $^1\text{H}$  NMR spectrum of compound **4r** at 400 MHz in DMSO- $d_6$

DUJ/DC-208  
single pulse decoupled gated NOE

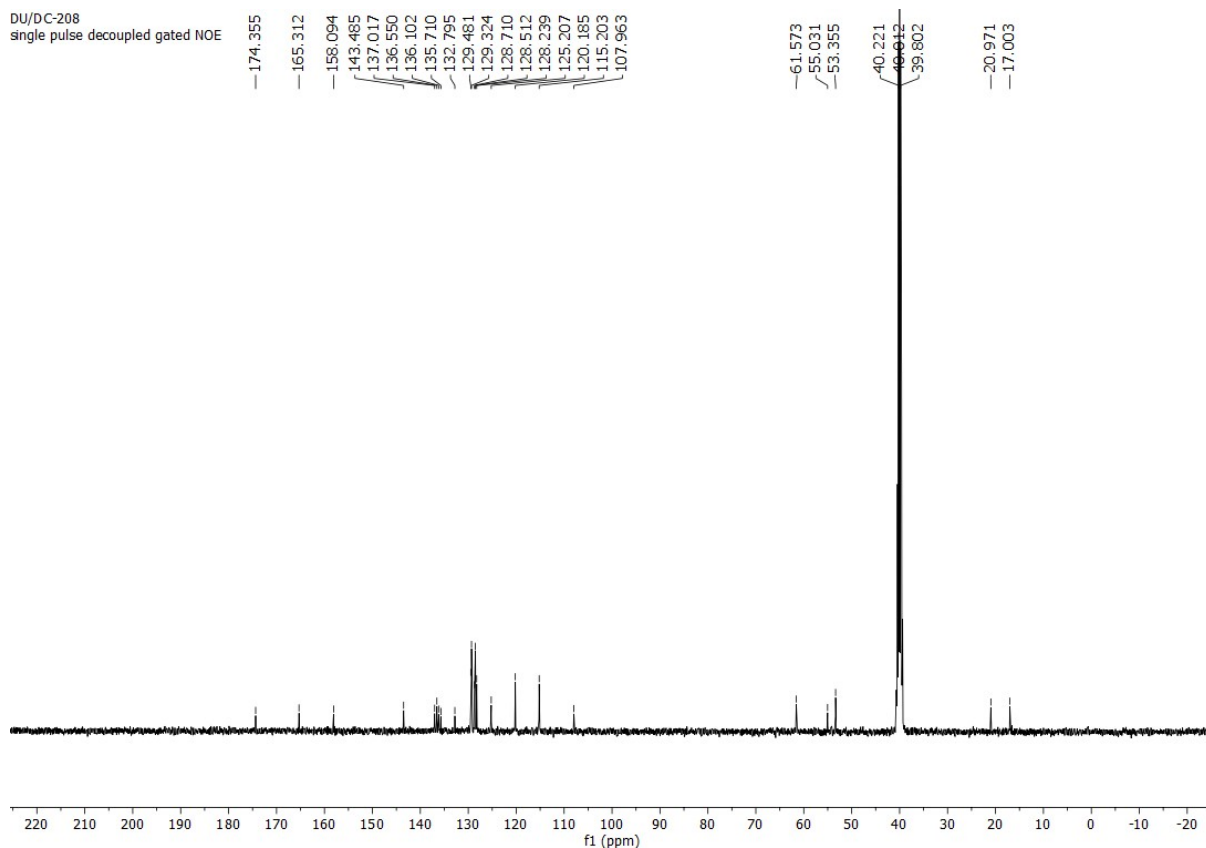

Figure S38.  $^{13}\text{C}$  NMR spectrum of compound **4r** at 150 MHz in DMSO- $d_6$

DUJ/DC-209  
single\_pulse

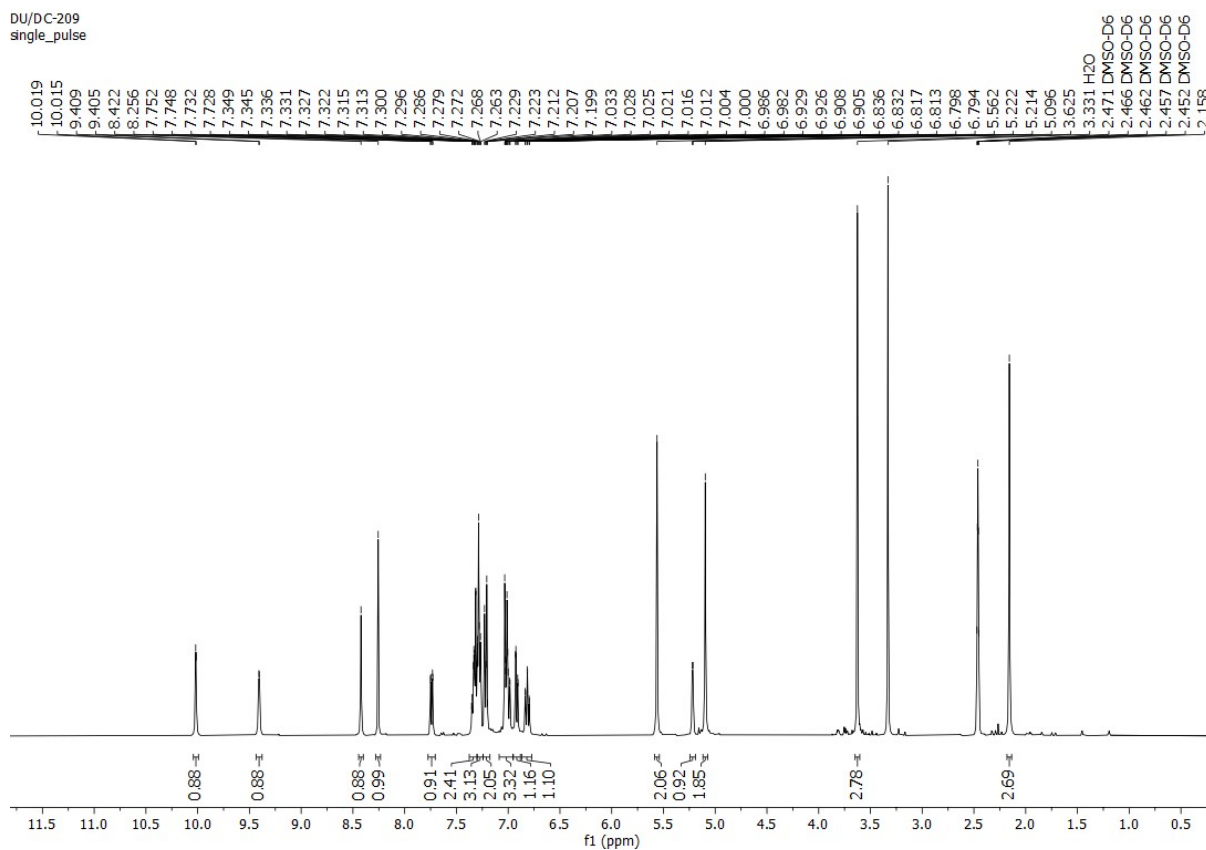

Figure S39.  $^1\text{H}$  NMR spectrum of compound **4s** at 400 MHz in DMSO- $d_6$

DU/D C-209  
single pulse decoupled gated NOE

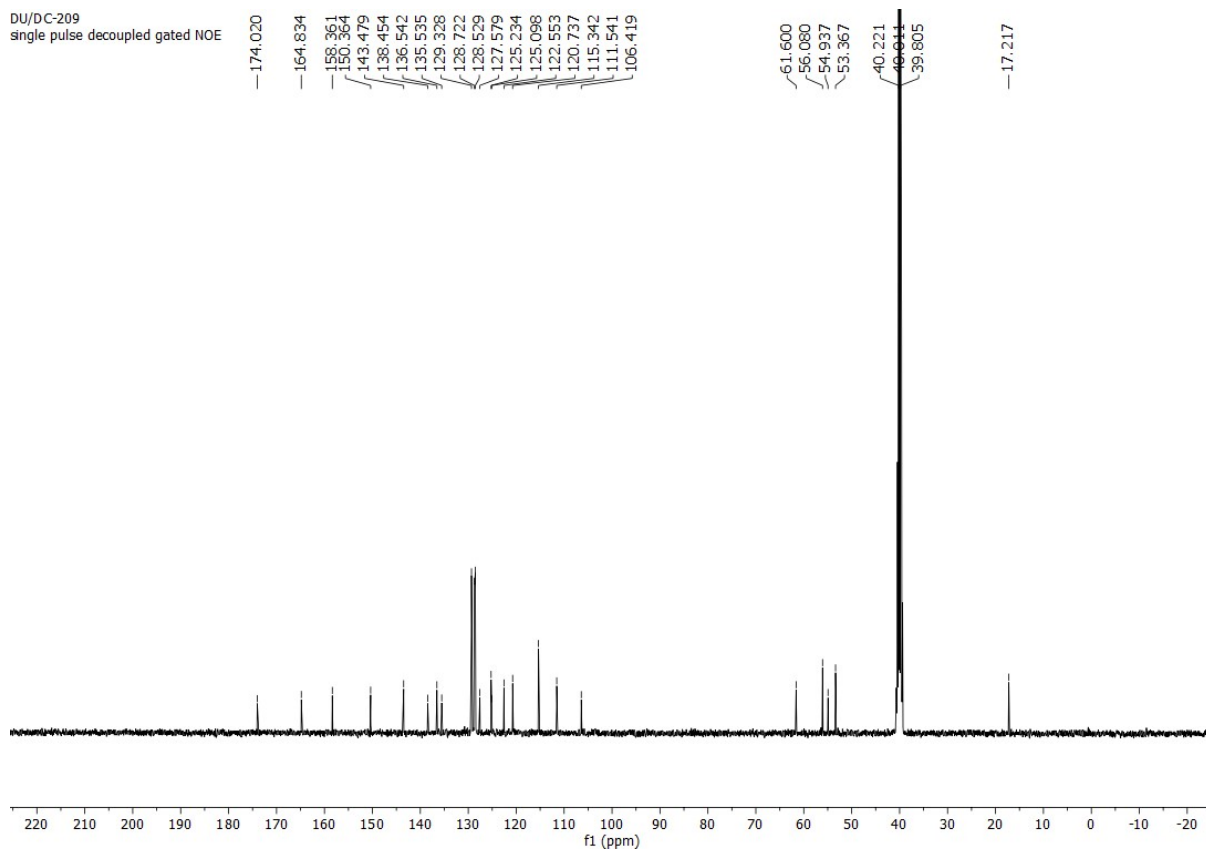

Figure S40.  $^{13}\text{C}$  NMR spectrum of compound **4s** at 150 MHz in DMSO- $d_6$

DU/D C-210  
single\_pulse

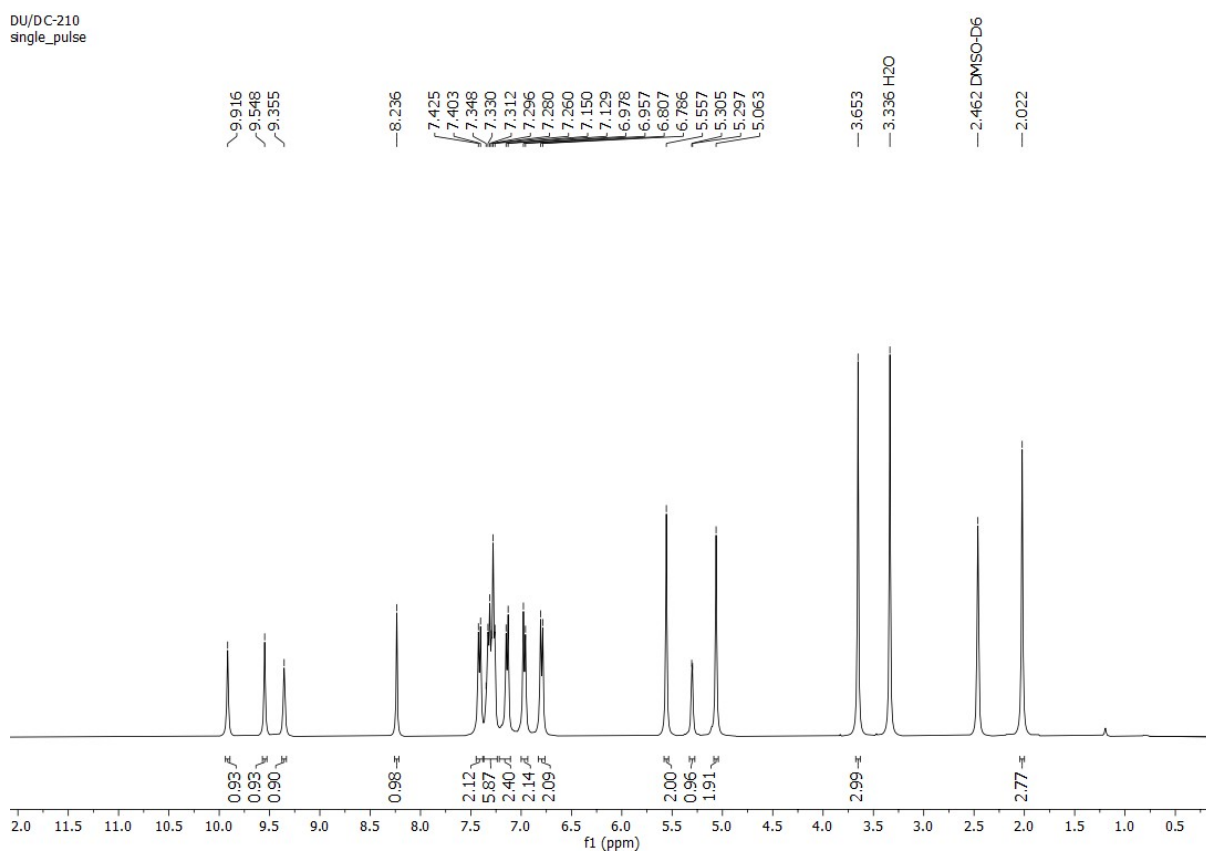

Figure S41.  $^1\text{H}$  NMR spectrum of compound **4t** at 400 MHz in DMSO- $d_6$

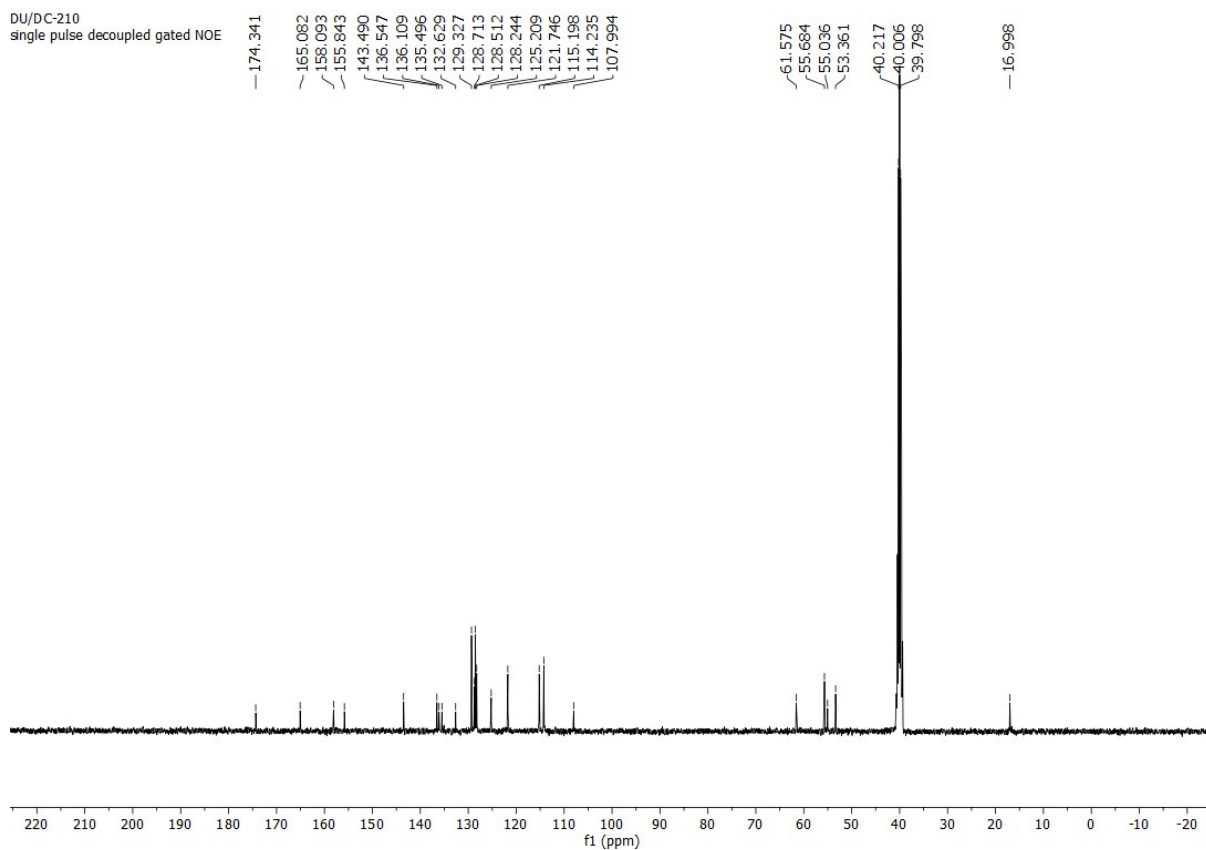

**Figure S42.**  $^{13}\text{C}$  NMR spectrum of compound **4b** at 150 MHz in  $\text{DMSO-d}_6$

## Mass spectra of **4a-4t**

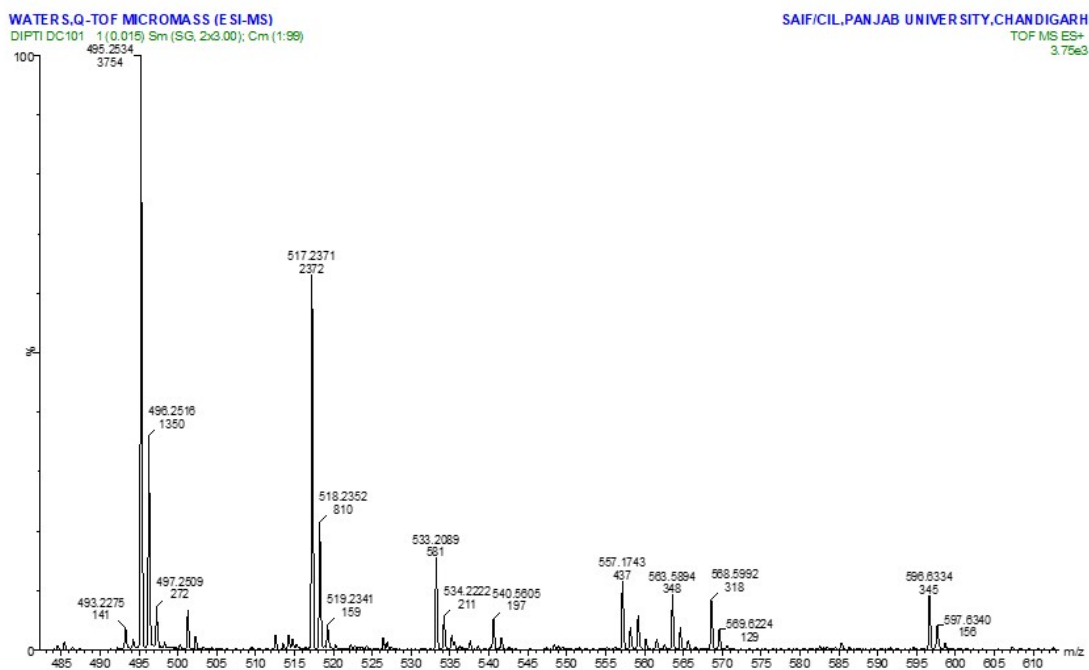

**Figure S43.** HRMS of compound **4a**

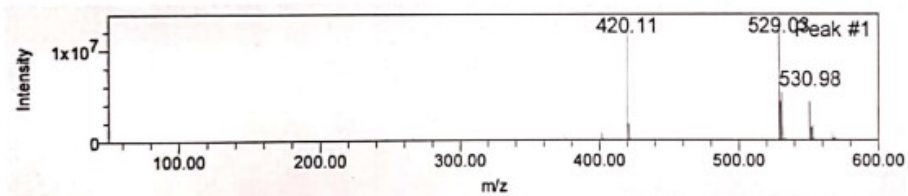

**Peak Results**

|   | RT     | Area      | % Area | Name | Base Peak (m/z) |
|---|--------|-----------|--------|------|-----------------|
| 1 | 20.009 | 337927508 | 100.00 |      | 529.03          |

**Figure S44. LCMS of compound 4b**

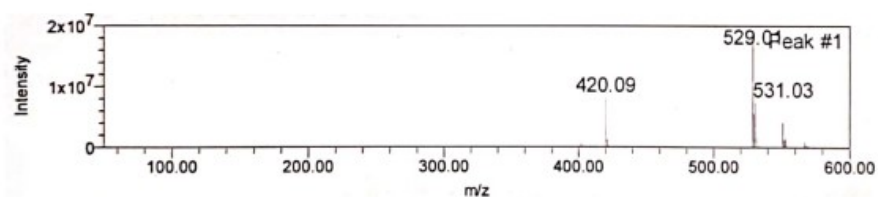

**Peak Results**

|   | RT     | Area      | % Area | Name | Base Peak (m/z) |
|---|--------|-----------|--------|------|-----------------|
| 1 | 21.057 | 391689307 | 100.00 |      | 529.01          |

**Figure S45. LCMS of compound 4c**

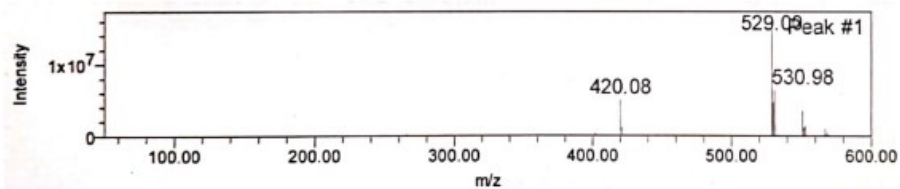

**Peak Results**

|   | RT     | Area      | % Area | Name | Base Peak (m/z) |
|---|--------|-----------|--------|------|-----------------|
| 1 | 21.080 | 281838188 | 100.00 |      | 529.00          |

**Figure S46. LCMS of compound 4d**



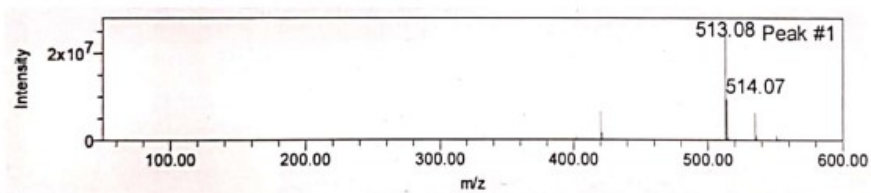

**Peak Results**

| RT       | Area      | % Area | Name | Base Peak (m/z) |
|----------|-----------|--------|------|-----------------|
| 1 19.502 | 378301089 | 100.00 |      | 513.08          |

**Figure S47. LCMS of compound 4e**

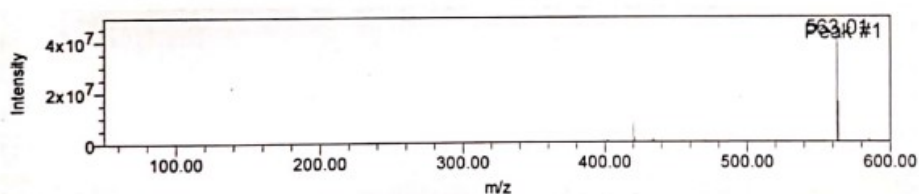

**Peak Results**

| RT       | Area      | % Area | Name | Base Peak (m/z) |
|----------|-----------|--------|------|-----------------|
| 1 21.897 | 541048205 | 100.00 |      | 563.01          |

**Figure S48. LCMS of compound 4f**

Lambda.210 nm Analysed by:

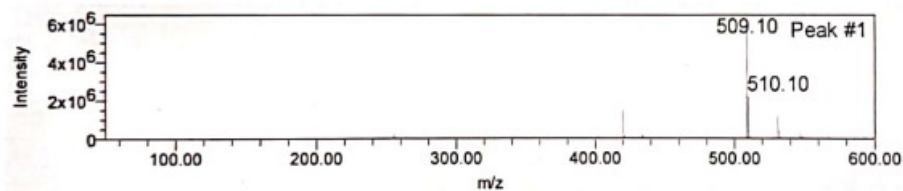

**Peak Results**

| RT       | Area     | % Area | Name | Base Peak (m/z) |
|----------|----------|--------|------|-----------------|
| 1 18.903 | 69328238 | 100.00 |      | 509.10          |

**Figure S49. LCMS of compound 4g**

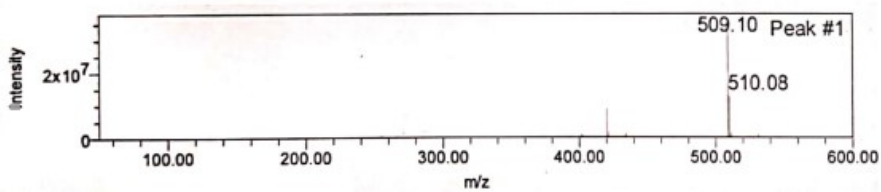

**Peak Results**

|   | RT     | Area      | % Area | Name | Base Peak (m/z) |
|---|--------|-----------|--------|------|-----------------|
| 1 | 20.018 | 771578598 | 100.00 |      | 509.10          |

**Figure S50. LCMS of compound 4h**

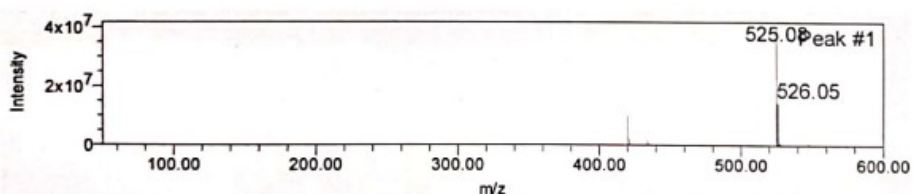

**Peak Results**

|   | RT     | Area      | % Area | Name | Base Peak (m/z) |
|---|--------|-----------|--------|------|-----------------|
| 1 | 19.640 | 575852929 | 100.00 |      | 525.08          |

**Figure S51. LCMS of compound 4i**

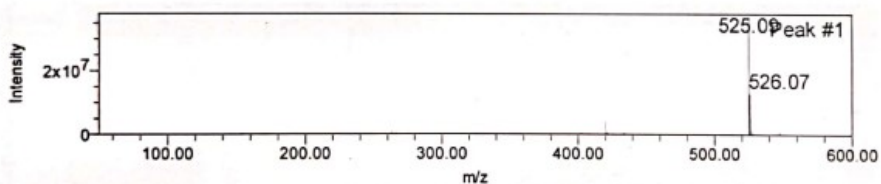

**Peak Results**

|   | RT     | Area      | % Area | Name | Base Peak (m/z) |
|---|--------|-----------|--------|------|-----------------|
| 1 | 18.485 | 373959080 | 100.00 |      | 525.09          |

**Figure S52. LCMS of compound 4j**

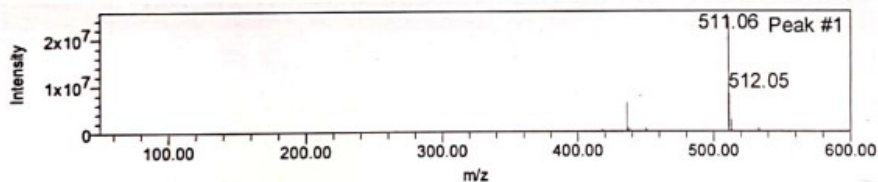

**Peak Results**

|   | RT     | Area      | % Area | Name | Base Peak (m/z) |
|---|--------|-----------|--------|------|-----------------|
| 1 | 20.433 | 466055335 | 100.00 |      | 511.06          |

**Figure S53. LCMS of compound 4k**

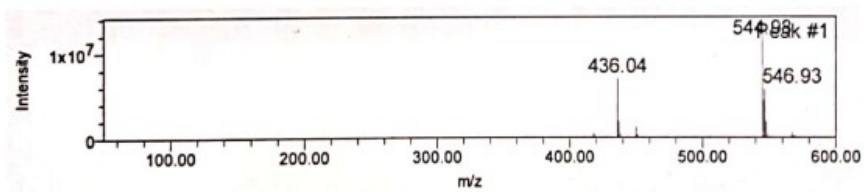

| Peak Results |        |           |      |                 |
|--------------|--------|-----------|------|-----------------|
| RT           | Area   | % Area    | Name | Base Peak (m/z) |
| 1            | 21.348 | 373579212 |      | 544.98          |

Figure S54. LCMS of compound 4l

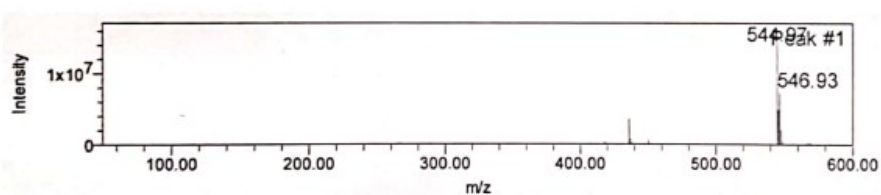

| Peak Results |        |           |      |                 |
|--------------|--------|-----------|------|-----------------|
| RT           | Area   | % Area    | Name | Base Peak (m/z) |
| 1            | 22.557 | 537694879 |      | 544.97          |

Figure S55. LCMS of compound 4m

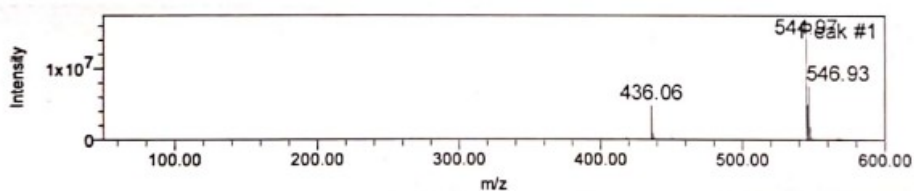

| Peak Results |        |           |      |                 |
|--------------|--------|-----------|------|-----------------|
| RT           | Area   | % Area    | Name | Base Peak (m/z) |
| 1            | 22.376 | 366963147 |      | 544.97          |

Figure S56. LCMS of compound 4n

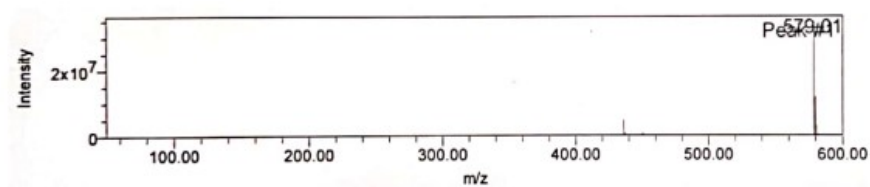

| Peak Results |        |           |      |                 |
|--------------|--------|-----------|------|-----------------|
| RT           | Area   | % Area    | Name | Base Peak (m/z) |
| 1            | 23.250 | 463429659 |      | 579.01          |

Figure S57. LCMS of compound 4p

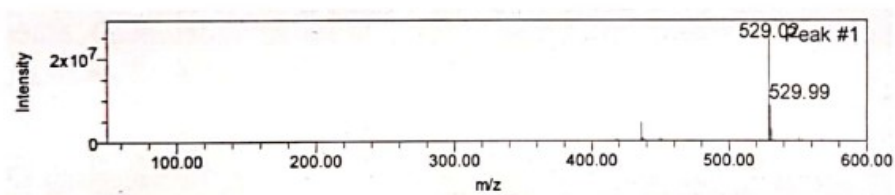

**Peak Results**

| RT | Area   | % Area    | Name   | Base Peak (m/z) |
|----|--------|-----------|--------|-----------------|
| 1  | 20.750 | 444407778 | 100.00 | 529.02          |

**Figure S58. LCMS of compound 4p**

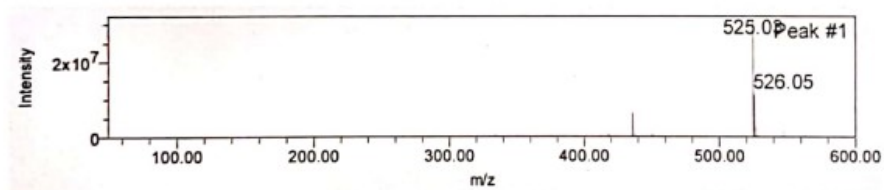

**Peak Results**

| RT | Area   | % Area    | Name   | Base Peak (m/z) |
|----|--------|-----------|--------|-----------------|
| 1  | 20.321 | 534054667 | 100.00 | 525.03          |

**Figure S59. LCMS of compound 4q**

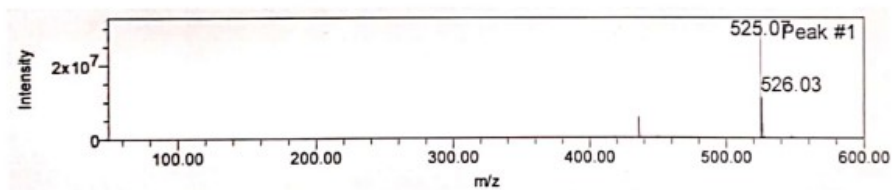

**Peak Results**

| RT | Area   | % Area    | Name   | Base Peak (m/z) |
|----|--------|-----------|--------|-----------------|
| 1  | 21.454 | 557440886 | 100.00 | 525.07          |

**Figure S60. LCMS of compound 4r**

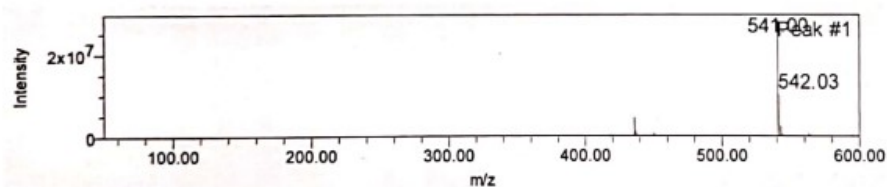

**Peak Results**

| RT | Area   | % Area    | Name   | Base Peak (m/z) |
|----|--------|-----------|--------|-----------------|
| 1  | 21.074 | 758060040 | 100.00 | 541.00          |

**Figure S61. LCMS of compound 4s**

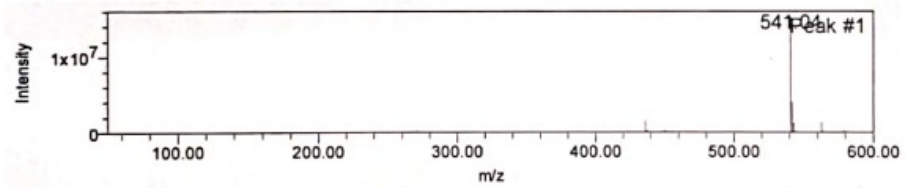

**Peak Results**

|   | RT     | Area      | % Area | Name | Base Peak (m/z) |
|---|--------|-----------|--------|------|-----------------|
| 1 | 19.844 | 139043859 | 100.00 |      | 541.04          |

**Figure S62.** LCMS of compound **4t**
